# Supplementary material for: Combinatorial effects of environmental parameters on transcriptional regulation in Saccharomyces cerevisiae: A quantitative analysis of a compendium of chemostat-based transcriptome data
Source: PubMed Central journal article supplement (PMC2640415; doi:10.1186/1471-2164-10-53), 2009-01-27

Of the 54 dubious genes, we selected the genes, for which aeration or an interaction effect between carbon limitation and aeration, were significant predictors according to the regression model. These 35 genes were screened against all quantified peptides as identified in [1].

Three were found:

1. YAR073W

The IMD family consist of five ORF's:

| Systematic name | Gene name | SGD Status | Position                      |
|-----------------|-----------|------------|-------------------------------|
| YAR073W         | IMD1      | Dubious    | ChrI:<br>227733 to 228944     |
| YAR075W         | ---       | Dubious    | ChrI:<br>228835 to 229308     |
| YHR216W         | IMD2      | Verified   | ChrVIII:<br>554396 to 555967  |
| YLR432W         | IMD3      | Verified   | ChrXII:<br>1002554 to 1004125 |
| YML056C         | IMD4      | Verified   | ChrXIII:<br>164176 to 162194  |

All these ORF's exhibit a large degree of sequence similarity. The probes on the microarray are not unique for these ORF's. Consequently, cross-hybridization is expected. The expression patterns of these ORF's are highly similar, especially for IMD1, IMD2 and IMD3. Twelve peptides could be retrieved which had 100% protein sequence similarity with one or more members of the IMD family. Amongst these twelve, there were several unique for one particular member of the IMD family (and also unique with respect to the rest of the genome).

| Peptide nr | 3     | 6     | 8     | 9     | 10    | 11    |
|------------|-------|-------|-------|-------|-------|-------|
| Unique for | IMD 1 | IMD 2 | IMD 3 | IMD 3 | IMD 3 | IMD 3 |

Thus a unique peptide was found for YAR073W.

2. YGR069w

A unique peptide was found for YGR069w

3. YPR195C

A unique peptide was found for YPR195C

All alignments were obtained using BLAST [2]. Visualization of the alignment of all identified peptides is performed using ClustalX [3] (described in [4]) and is found on the following pages.

References:

[1] M.J.L. de Groot *et al.*, 2007, Quantitative proteomics and transcriptomics of anaerobic and aerobic yeast cultures reveals posttranscriptional regulation of key cellular processes, *Microbiol – SGM*

[2] NCBI BLAST, <http://www.ncbi.nlm.nih.gov/blast/Blast.cgi>

[3] ClustalX <ftp://ftp-igbmc.u-strasbg.fr/pub/ClustalX/>

[4] J.D. Thompson *et al.*, 1997, The ClustalX windows interface: flexible strategies for multiple sequence alignment aided by quality analysis tools. *Nucleic Acids Research*, 25:4876-4882.

List of the 54 dubious genes. The grey boxes indicate genes which are not found on YG 2.0, the successor of the Affymetrix YG S98 GeneChip.

|                |                |                |                |
|----------------|----------------|----------------|----------------|
| 'YAR069C'      | 'YER188W'      | 'YJL199C-MBB1' | 'YML089C'      |
| 'YAR073W-IMD1' | 'YFR020W'      | 'YKL031W'      | 'YML122C'      |
| 'YAR075W-IMD2' | 'YGL042C'      | 'YKL066W'      | 'YMR052C-A'    |
| 'YBL048W'      | 'YGL188C'      | 'YKL076C-PSY1' | 'YMR103C'      |
| 'YBL065W'      | 'YGR039W'      | 'YKL136W'      | 'YMR320W'      |
| 'YBL070C'      | 'YGR069W'      | 'YKL169C'      | 'YNL140C-RLR1' |
| 'YBR056w-a'    | 'YGR073C'      | 'YKL177W'      | 'YOL153C'      |
| 'YBR116C-TKL2' | 'YGR122C-A'    | 'YKR012C'      | 'YOL160W'      |
| 'YBR292C'      | 'YGR182C'      | 'YLL020C-KNS1' | 'YOR013W'      |
| 'YBR300C'      | 'YGR190C'      | 'YLR112W'      | 'YOR318C'      |
| 'YCL012W-BUD3' | 'YIL059C'      | 'YLR252W'      | 'YPR150W'      |
| 'YDR094W'      | 'YIL071w-a'    | 'YLR280C'      | 'YPR195C'      |
| 'YDR133C'      | 'YIL167W-SDL1' | 'YLR294C'      |                |
| 'YER067c-a'    | 'YJL119C'      | 'YLR311C'      |                |

# Peptide 1;

```
YAR075WP_O42831 -----
YML065C_IMD4_YEAST EDDSLVVSEVMTKNPVTGIKGITLKEGNEILKQTKKGKLLIVDDNGNLVSM 225
YHR432W_IMD3_YEAST EDNSLLVQDVMTKNPVTGAQGITLSEGNEILKKIKKGKLLIVDDNGNLVSM 224
YHR216W_IMD2_YEAST EDNSLLVQDVMTKNPVTGAQGITLSEGNEILKKIKKGKLLIVVDEKGNLVSM 224
YAR073W_IMD1_YEAST EDNSLLVQDVMTKNPVTGAQGITLSEGNEILKKIKKGKLLIVVDEKGNLVSM 224
pep1 -----KNPVTGAQGITLSEGNEILKK----- 21
ruler ...180.....190.....200.....210.....220.....
```



# Peptide 2;

```
YAR075WP_O42831 -----
YML065C_IMD4_YEAST EDDSLVVSEVMTKNPVTGIKGITLKEGNEILKQTKKGKLLIVDDNGNLVSM 225
YHR432W_IMD3_YEAST EDNSLLVQDVMTKNPVTGAQGITLSEGNEILKKIKKGKLLIVDDNGNLVSM 224
YHR216W_IMD2_YEAST EDNSLLVQDVMTKNPVTGAQGITLSEGNEILKKIKKGKLLIVVDEKGNLVSM 224
YAR073W_IMD1_YEAST EDNSLLVQDVMTKNPVTGAQGITLSEGNEILKKIKKGKLLIVVDEKGNLVSM 224
pep2 -----RLLVVDEKG----- 9
ruler ...180.....190.....200.....210.....220.....
```



# Peptide 3; unique for IMD1

```
YHR432W_IMD3_YEAST DLEIIAGNVATREQAANLIAAGADGLRIGMGSGSICITQEVMACGRPQGT* 110
YML065C_IMD4_YEAST DLEIIAGNVATREQAANLIAAGADGLRIGMGSGSICITQEVMACGRPQGT* 111
YHR216W_IMD2_YEAST GLEVIAGNVVTR*QAANLIAAGADGLRIGMG*TSICITQEVMACGRPQGT* 110
YAR073W_IMD1_YEAST DLEIIAGNVVTK*QAANLIAAGADGLRIGMG*TSICITQKVMACGRPQGT* 350
YAR075WP_O42831 RLKAYRGMGSIDAMQKTG*TKGNASTSR*YFSES*DSVLVAQGV*SGAVVDK*GSI 95
pep3 -----KEQAANLIAAGADGLRI----- 17
ruler 0.....310.....320.....330.....340.....350
```



# Peptide 4;

```
YAR075WP_O42831 -----
YML065C_IMD4_YEAST VGEVKVMKRKFGFSGFPV*TEDGK*CPGKLVGLVTSRDIQFLEDDSLVVSEVM 185
YHR432W_IMD3_YEAST VGEAKSMKERFGFSGFPV*TEDGKRN*GKLMGIVTSRDIQFVEDNSLLVQDVM 184
YHR216W_IMD2_YEAST VGEAKSMKEKYGFAGFPV*TDGKRN*AKLVGVITSRDIQFVEDNSLLVQDVM 184
YAR073W_IMD1_YEAST VGEAKSMKEKYGFAGFPV*TDGKRN*AKLVGAITSRDIQFVEDNSLLVQDVM 184
pep4 -----KLVGVITSRD----- 10
ruler ...140.....150.....160.....170.....180.....
```



# Peptide 5;

|                    |                                                     |     |
|--------------------|-----------------------------------------------------|-----|
| YAR075WP_O42831    | -----                                               |     |
| YML065C_IMD4_YEAST | IVDDNGNLVSMLSRADLMKNQNYPLASKSATTKOLLCGAAIGTIEADKERL | 265 |
| YHR432W_IMD3_YEAST | IVDDNGNLVSMLSRFDLMKNQNYPLASKSATTKOLLCGAAIGTIDADKERL | 264 |
| YHR216W_IMD2_YEAST | VVDEKGNLVSMLSRFDLMKNQNYPLASKSANTKOLLCGASIGTMDADKERL | 264 |
| YAR073W_IMD1_YEAST | VVDEKGNLVSMLSRFDLMKNQKYPLASKSANTKOLLWGASIGTMDADKERL | 264 |
| pep5               | -----KNQNYPLASKS-----                               | 11  |
| ruler              | ...220.....230.....240.....250.....260.....         |     |

# Peptide 6; unique for IMD2

|                    |                                                      |     |
|--------------------|------------------------------------------------------|-----|
| YHR216W_IMD2_YEAST | SIFELNMLKWVKESFPGLEVIAGNVVTTREQAANLIAAGADGLRIGMGTGSI | 334 |
| pep6               | -----KESFPGLEVIAGNVVTTRE-----                        | 18  |
| YHR432W_IMD3_YEAST | SIFQLNMIKWIKETFPDLEIIAGNVATREQAANLIAAGADGLRIGMGSISI  | 334 |
| YML065C_IMD4_YEAST | SVFQLNMIKWIKETFPDLEIIAGNVATREQAANLIAAGADGLRIGMGSISI  | 335 |
| YAR075WP_O42831    | -----MVVF-----                                       | 4   |
| YAR073W_IMD1_YEAST | SIFQLNMIKWIKETFPDLEIIAGNVVT-----                     | 310 |
| ruler              | ...290.....300.....310.....320.....330.....          |     |

# Peptide 7;

|                    |                                                     |     |
|--------------------|-----------------------------------------------------|-----|
| YAR075WP_O42831    | TESPGEYLYQDGKRLKAYRGMGSIDAMQKTGTKGNASTSRYFSESDSVLVA | 82  |
| YML065C_IMD4_YEAST | TESPGEYFYKDGKRLKAYRGMGSIDAMQKTGNKGNASTSRYFSESDSVLVA | 449 |
| YHR432W_IMD3_YEAST | TESPGEYFYQDGKRLKAYRGMGSIDAMQKTGTKGNASTSRYFSESDSVLVA | 448 |
| YHR216W_IMD2_YEAST | TESPGEYFYQDGKRLKAYRGMGSIDAMQKTGTKGNASTSRYFSESDSVLVA | 448 |
| YAR073W_IMD1_YEAST | KEQAANLIAAGADGLRIGMGTGSIKITQKVMACGRPQGTAVYN---VCEFA | 358 |
| pep7               | -----RGMGSIDAMQKT-----                              | 12  |
| ruler              | 0.....410.....420.....430.....440.....450           |     |

\* \*\*\* \*\*

# Peptide 8;

|                    |                                                     |    |
|--------------------|-----------------------------------------------------|----|
| YAR075WP_O42831    | -----                                               |    |
| YML065C_IMD4_YEAST | MSAALDYKKALEHLKTYSSKDGLSVQELMDSSTRGGLTYNDFLVLPLVLN  | 51 |
| YHR432W_IMD3_YEAST | -MAAVRDYKTALEFAKSLPRLDGLSVQELMDSKTRGGLTYNDFLVLPLVLD | 50 |
| YHR216W_IMD2_YEAST | -MAAIRDYKTALDFTKSLPRPDGLSVQELMDSKIRGGLTYNDFLILPLVLD | 50 |
| YAR073W_IMD1_YEAST | -MAAIRDYKTALDLTKSLPRPDGLSVQELMDSKIRGGLAYNDFLILPLVLD | 50 |
| pep8               | -----RLDGLSVQELMDSKT-----                           | 15 |
| ruler              | 1.....10.....20.....30.....40.....50.               |    |

# Peptide 9; unique for IMD3

```
YAR075WP_O42831 -----
YML065C_IMD4_YEAST FPVTEDGKCPGKLVGLVTSRDIQFLEDDSLVVSEVMTKNPVTGIKGITLKE 200
YHR432W_IMD3_YEAST FPVTEDGKRNGKLMGIVTSRDIQFVEDNSLLVQDVMTKNPVTGAQGITLSE 199
YHR216W_IMD2_YEAST FPVTTDGKRNAKLVGVITSRDIQFVEDNSLLVQDVMTKNPVTGAQGITLSE 199
YAR073W_IMD1_YEAST FPVTADGKRNAKLVGAITSRDIQFVEDNSLLVQDVMTKNPVTGAQGITLSE 199
pep9 -----KLMGIVTSRD----- 10
ruler 0.....160.....170.....180.....190.....200
```



# Peptide 10; unique for IMD3

```
YAR075WP_O42831 -----
YML065C_IMD4_YEAST EGNEILKQTKKGKLLIVDDNGNLVSMLSRADLMKNQNYPLASKSATTKQLL 250
YHR432W_IMD3_YEAST EGNEILKKIKKGKLLIVDDNGNLVSMLSRTDLMKNQNYPLASKSATTKQLL 249
YHR216W_IMD2_YEAST EGNEILKKIKKGRLLVVDEKGNLVSMLSRTDLMKNQNYPLASKSANTKQLL 249
YAR073W_IMD1_YEAST EGNEILKKIKKGRLLVVDEKGNLVSMLSRTDLMKNQKYPLASKSANTKQLL 249
pep10 -----KLLIVDDNGNLVSMLSRT----- 18
ruler 0.....210.....220.....230.....240.....250
```



# Peptide 11; unique for IMD3

```
YAR075WP_O42831 -----
YML065C_IMD4_YEAST QNYPLASKSATTKQLLCGAAIGTIEADKERLRLIVEAGLDVVILDSSQGNS 285
YHR432W_IMD3_YEAST QNYPLASKSATTKQLLCGAAIGTIDADKERLRLIVEAGLDVVILDSSQGNS 284
YHR216W_IMD2_YEAST QNYPLASKSANTKQLLCGASIGTMDADKERLRLLVKAGLDVVILDSSQGNS 284
YAR073W_IMD1_YEAST QKYPLASKSANTKQLLWGASIGTMDADKERLRLLVKAGLDVVILDSSQG-- 282
pep11 -----KQLLCGAAIGTIDADKERL----- 19
ruler ...240.....250.....260.....270.....280.....
```



# Peptide 12;

```
YHR432W_IMD3_YEAST IFQLNMIKWIKETFPDLEIIAGNVATREQAANLIAAGADGLRIGMGSGSIC 275
pep12 -----KETFPDLEIIAGNVATRE----- 18
YAR075WP_O42831 ----- 5
YML065C_IMD4_YEAST VFQLNMIKWIKETFPDLEIIAGNVATREQAANLIAAGADGLRIGMGSGSIC 276
YHR216W_IMD2_YEAST IFELNMLKWVKESFPGLEVIAGNVVTRERQAANLIAAGADGLRIGMGTGSIC 335
YAR073W_IMD1_YEAST IFQLNMIKWIKETFPDLEIIAGNVVT----- 310
ruler ...290.....300.....310.....320.....330.....
```



# Peptide unique for YGR069W

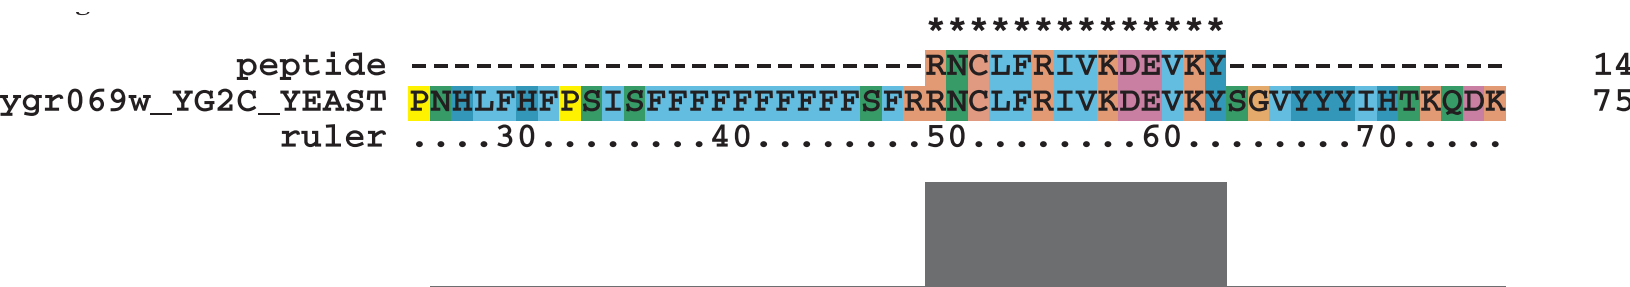

# Peptide unique for YPR195C

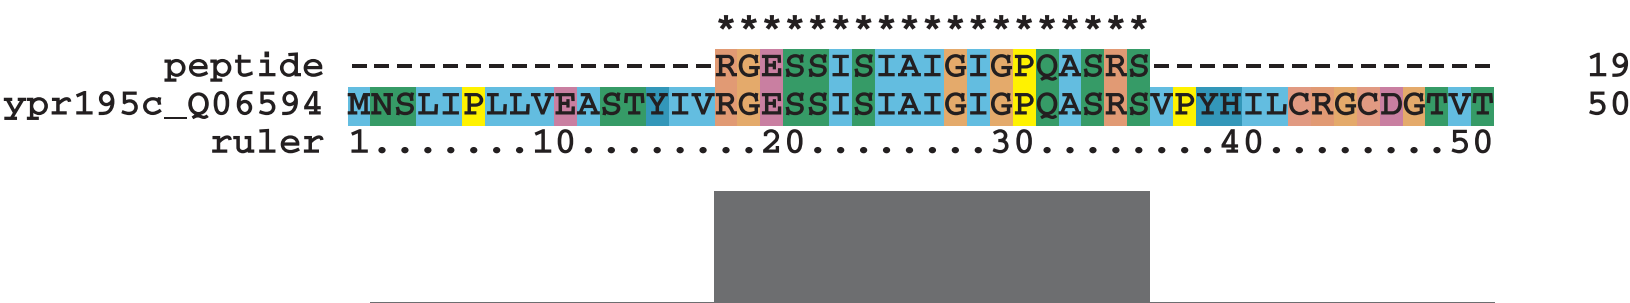

Supplement: 1471-2164-10-53-S5.pdf [file 1471-2164-10-53-S5.pdf]
