# Supplementary material for: Combinatorial effects of environmental parameters on transcriptional regulation in Saccharomyces cerevisiae: A quantitative analysis of a compendium of chemostat-based transcriptome data
Source: PubMed Central journal article supplement (PMC2640415; doi:10.1186/1471-2164-10-53), 2009-01-27
Supplement: 1471-2164-10-53-S1.pdf [file 1471-2164-10-53-S1.pdf]

$Q > 8.5 \cdot 10^{-4}$      $1.1 \cdot 10^{-5}$      $1.3 \cdot 10^{-7}$      $1.5 \cdot 10^{-9}$      $1.7 \cdot 10^{-11}$      $1.4 \cdot 10^{-13}$      $1.3 \cdot 10^{-15}$      $1.9 \cdot 10^{-17}$      $2.7 \cdot 10^{-19}$      $2.8 \cdot 10^{-21}$      $4.3 \cdot 10^{-23}$      $Q < 8 \cdot 10^{-26}$   
 $P > 10^{-6}$      $10^{-8}$      $10^{-10}$      $10^{-13}$      $10^{-15}$      $10^{-17}$      $10^{-19}$      $10^{-21}$      $10^{-23}$      $10^{-26}$      $10^{-28}$      $P < 10^{-30}$

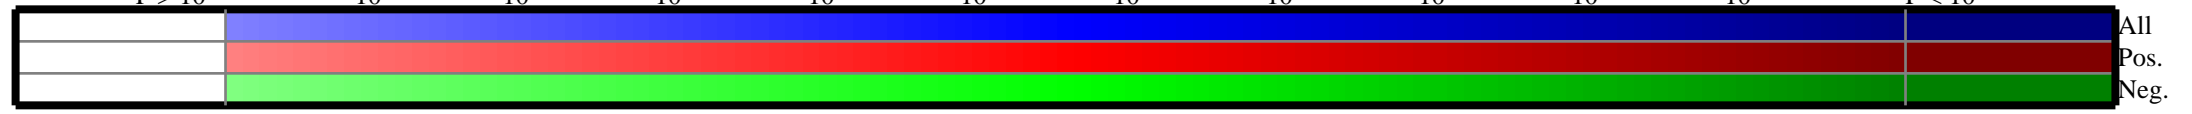

### C-source

| Category                                                                | $Q > 8.5 \cdot 10^{-4}$ | $1.1 \cdot 10^{-5}$ | $1.3 \cdot 10^{-7}$ | $1.5 \cdot 10^{-9}$ | $1.7 \cdot 10^{-11}$ | $1.4 \cdot 10^{-13}$ | $1.3 \cdot 10^{-15}$ | $1.9 \cdot 10^{-17}$ | $2.7 \cdot 10^{-19}$ | $2.8 \cdot 10^{-21}$ | $4.3 \cdot 10^{-23}$ | $Q < 8 \cdot 10^{-26}$ |
|-------------------------------------------------------------------------|-------------------------|---------------------|---------------------|---------------------|----------------------|----------------------|----------------------|----------------------|----------------------|----------------------|----------------------|------------------------|
| carbohydrate metabolism – 273                                           |                         |                     |                     |                     | 43                   |                      |                      |                      |                      |                      |                      |                        |
| monosaccharide metabolism – 119                                         |                         |                     |                     |                     | 23                   |                      |                      |                      |                      |                      |                      |                        |
| glucose metabolism – 84                                                 |                         |                     |                     |                     | 21                   |                      |                      |                      |                      |                      |                      |                        |
| glucose catabolism – 48                                                 |                         |                     |                     |                     | 11                   |                      |                      |                      |                      |                      |                      |                        |
| alcohol metabolism – 189                                                |                         |                     |                     |                     | 30                   |                      |                      |                      |                      |                      |                      |                        |
| organic acid metabolism – 353                                           |                         |                     |                     |                     | 37                   |                      |                      |                      |                      |                      |                      |                        |
| acetyl-CoA metabolism – 33                                              |                         |                     |                     |                     | 15                   |                      |                      |                      |                      |                      |                      |                        |
| generation of precursor metabolites and energy – 360                    |                         |                     |                     |                     | 48                   |                      |                      |                      |                      |                      |                      |                        |
| main pathways of carbohydrate metabolism – 95                           |                         |                     |                     |                     | 31                   |                      |                      |                      |                      |                      |                      |                        |
| glycolysis – 36                                                         |                         |                     |                     |                     | 10                   |                      |                      |                      |                      |                      |                      |                        |
| tricarboxylic acid cycle – 28                                           |                         |                     |                     |                     | 13                   |                      |                      |                      |                      |                      |                      |                        |
| tricarboxylic acid cycle intermediate metabolism – 18                   |                         |                     |                     |                     | 9                    |                      |                      |                      |                      |                      |                      |                        |
| glycine metabolism – 10                                                 |                         |                     |                     |                     | 7                    |                      |                      |                      |                      |                      |                      |                        |
| coenzyme metabolism – 153                                               |                         |                     |                     |                     | 32                   |                      |                      |                      |                      |                      |                      |                        |
| amino acid biosynthesis – 136                                           |                         |                     |                     |                     |                      |                      |                      | 6                    |                      |                      |                      |                        |
| catabolism – 404                                                        |                         |                     |                     |                     | 55                   |                      |                      |                      |                      |                      |                      |                        |
| biosynthesis – 966                                                      | 37                      |                     |                     |                     |                      |                      |                      |                      |                      |                      |                      |                        |
| coenzyme catabolism – 30                                                |                         |                     |                     |                     | 13                   |                      |                      |                      |                      |                      |                      |                        |
| amine biosynthesis – 144                                                |                         |                     |                     |                     |                      |                      |                      | 6                    |                      |                      |                      |                        |
| energy derivation by oxidation of organic compounds – 225               |                         |                     |                     |                     | 37                   |                      |                      |                      |                      |                      |                      |                        |
| carbohydrate catabolism – 71                                            |                         |                     |                     |                     | 12                   |                      |                      |                      |                      |                      |                      |                        |
| hexose metabolism – 112                                                 |                         |                     |                     |                     | 23                   |                      |                      |                      |                      |                      |                      |                        |
| hexose catabolism – 48                                                  |                         |                     |                     |                     | 11                   |                      |                      |                      |                      |                      |                      |                        |
| carboxylic acid metabolism – 353                                        |                         |                     |                     |                     | 37                   |                      |                      |                      |                      |                      |                      |                        |
| cellular catabolism – 382                                               |                         |                     |                     |                     | 52                   |                      |                      |                      |                      |                      |                      |                        |
| cellular carbohydrate metabolism – 227                                  |                         |                     |                     |                     | 41                   |                      |                      |                      |                      |                      |                      |                        |
| nitrogen compound biosynthesis – 144                                    |                         |                     |                     |                     |                      |                      |                      | 6                    |                      |                      |                      |                        |
| cellular carbohydrate catabolism – 71                                   |                         |                     |                     |                     | 12                   |                      |                      |                      |                      |                      |                      |                        |
| alcohol catabolism – 56                                                 |                         |                     |                     |                     | 11                   |                      |                      |                      |                      |                      |                      |                        |
| acetyl-CoA catabolism – 28                                              |                         |                     |                     |                     | 13                   |                      |                      |                      |                      |                      |                      |                        |
| monosaccharide catabolism – 53                                          |                         |                     |                     |                     | 11                   |                      |                      |                      |                      |                      |                      |                        |
| cofactor metabolism – 181                                               |                         |                     |                     |                     | 34                   |                      |                      |                      |                      |                      |                      |                        |
| cofactor catabolism – 31                                                |                         |                     |                     |                     | 13                   |                      |                      |                      |                      |                      |                      |                        |
| tricarboxylic acid cycle – 28                                           |                         |                     |                     |                     | 13                   |                      |                      |                      |                      |                      |                      |                        |
| amino acid biosynthesis – 96                                            |                         |                     |                     |                     |                      |                      |                      | 6                    |                      |                      |                      |                        |
| mitochondrion – 986                                                     |                         |                     |                     |                     |                      |                      |                      |                      |                      |                      | 22                   |                        |
| cytosol – 313                                                           |                         |                     |                     |                     |                      |                      |                      | 13                   |                      |                      |                      |                        |
| cytosolic ribosome (sensu Eukaryota) – 130                              |                         |                     |                     |                     |                      |                      |                      | 10                   |                      |                      |                      |                        |
| cytosolic large ribosomal subunit (sensu Eukaryota) – 69                |                         |                     |                     |                     |                      |                      |                      | 10                   |                      |                      |                      |                        |
| large ribosomal subunit – 111                                           |                         |                     |                     |                     |                      |                      |                      | 10                   |                      |                      |                      |                        |
| mitochondrial part – 377                                                |                         |                     |                     |                     |                      |                      |                      |                      |                      | 13                   |                      |                        |
| cytosolic part – 159                                                    |                         |                     |                     |                     |                      |                      |                      | 11                   |                      |                      |                      |                        |
| intracellular – 284                                                     |                         |                     |                     |                     |                      |                      |                      | 13                   |                      |                      |                      |                        |
| mitochondrion – 937                                                     |                         |                     |                     |                     |                      |                      |                      |                      |                      |                      | 21                   |                        |
| ribosome – 184                                                          |                         |                     |                     |                     |                      |                      |                      | 11                   |                      |                      |                      |                        |
| cytosolic large ribosomal subunit (sensu Eukaryota) – 69                |                         |                     |                     |                     |                      |                      |                      | 10                   |                      |                      |                      |                        |
| ribonucleoprotein complex – 236                                         |                         |                     |                     |                     |                      |                      |                      | 11                   |                      |                      |                      |                        |
| structural constituent of ribosome – 203                                |                         |                     |                     |                     |                      |                      |                      | 11                   |                      |                      |                      |                        |
| iron ion transporter activity – 10                                      |                         |                     |                     |                     |                      |                      |                      |                      | 3                    |                      |                      |                        |
| structural constituent of ribosome – 203                                |                         |                     |                     |                     |                      |                      |                      | 11                   |                      |                      |                      |                        |
| C-compound and carbohydrate metabolism – 500                            | 71                      |                     |                     |                     | 70                   |                      |                      |                      |                      |                      |                      |                        |
| C-compound and carbohydrate utilization – 380                           |                         |                     |                     |                     | 54                   |                      |                      |                      |                      |                      |                      |                        |
| C-compound, carbohydrate catabolism – 115                               |                         |                     |                     |                     | 25                   |                      |                      |                      |                      |                      |                      |                        |
| sugar, glucoside, polyol and carboxylate catabolism – 80                |                         |                     |                     |                     | 19                   |                      |                      |                      |                      |                      |                      |                        |
| ENERGY – 348                                                            |                         |                     |                     |                     | 52                   |                      |                      |                      |                      |                      |                      |                        |
| glycolysis and gluconeogenesis – 59                                     |                         |                     |                     |                     | 11                   |                      |                      |                      |                      |                      |                      |                        |
| tricarboxylic-acid pathway (citrate cycle, Krebs cycle, TCA cycle) – 28 |                         |                     |                     |                     | 13                   |                      |                      |                      |                      |                      |                      |                        |
| mitochondrion – 169                                                     |                         |                     |                     |                     |                      |                      |                      |                      |                      |                      | 11                   |                        |
| UNCLASSIFIED PROTEINS – 1454                                            |                         | 31                  |                     |                     |                      |                      |                      |                      |                      |                      |                      | 37                     |
| Citrate cycle (TCA cycle) – 29                                          |                         |                     |                     |                     | 13                   |                      |                      |                      |                      |                      |                      |                        |
| Glyoxylate and dicarboxylate metabolism – 14                            |                         |                     |                     |                     | 8                    |                      |                      |                      |                      |                      |                      |                        |
| Ribosome – 134                                                          |                         |                     |                     |                     |                      |                      |                      | 11                   |                      |                      |                      |                        |
| SIP4 – 11                                                               |                         |                     |                     |                     | 8                    |                      |                      |                      |                      |                      |                      |                        |
| GAL4 – 20                                                               | 10                      |                     |                     | 9                   |                      |                      |                      |                      |                      |                      |                      |                        |
| SKN7 – 171                                                              |                         |                     |                     | 11                  |                      |                      |                      |                      |                      |                      |                      |                        |

452    69    220    346    28    73    13    77    73  
 356    39    160    190    14    45    5    36    3  
 102    30    60    156    14    28    8    41    70  
 C-source    C-source – Acetate    C-source – Galactose    C-source – Acetate | Ethanol    C-source – Acetate | Galactose    C-source – Glucose | Maltose    C-source – Glucose & Ammonium sulfate    C-source – Glucose & Limiting element – Carbon    C-source – Glucose & pH – 5    C-source – Glucose &

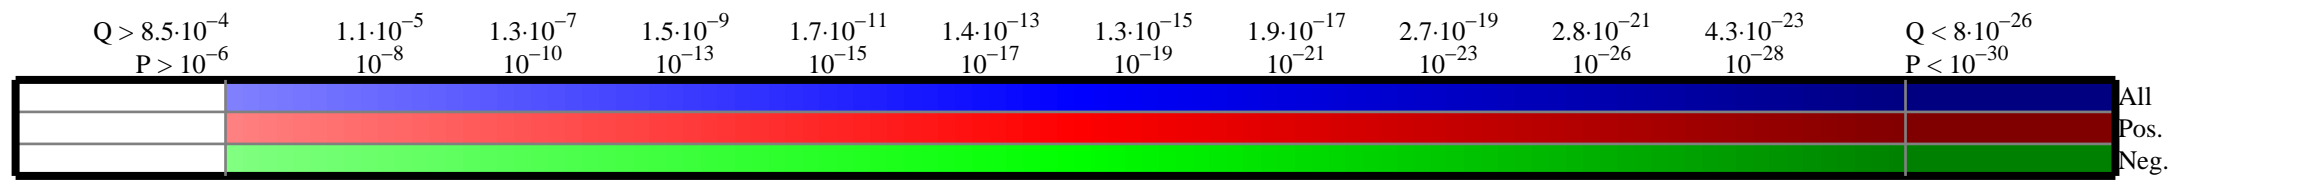

N-source

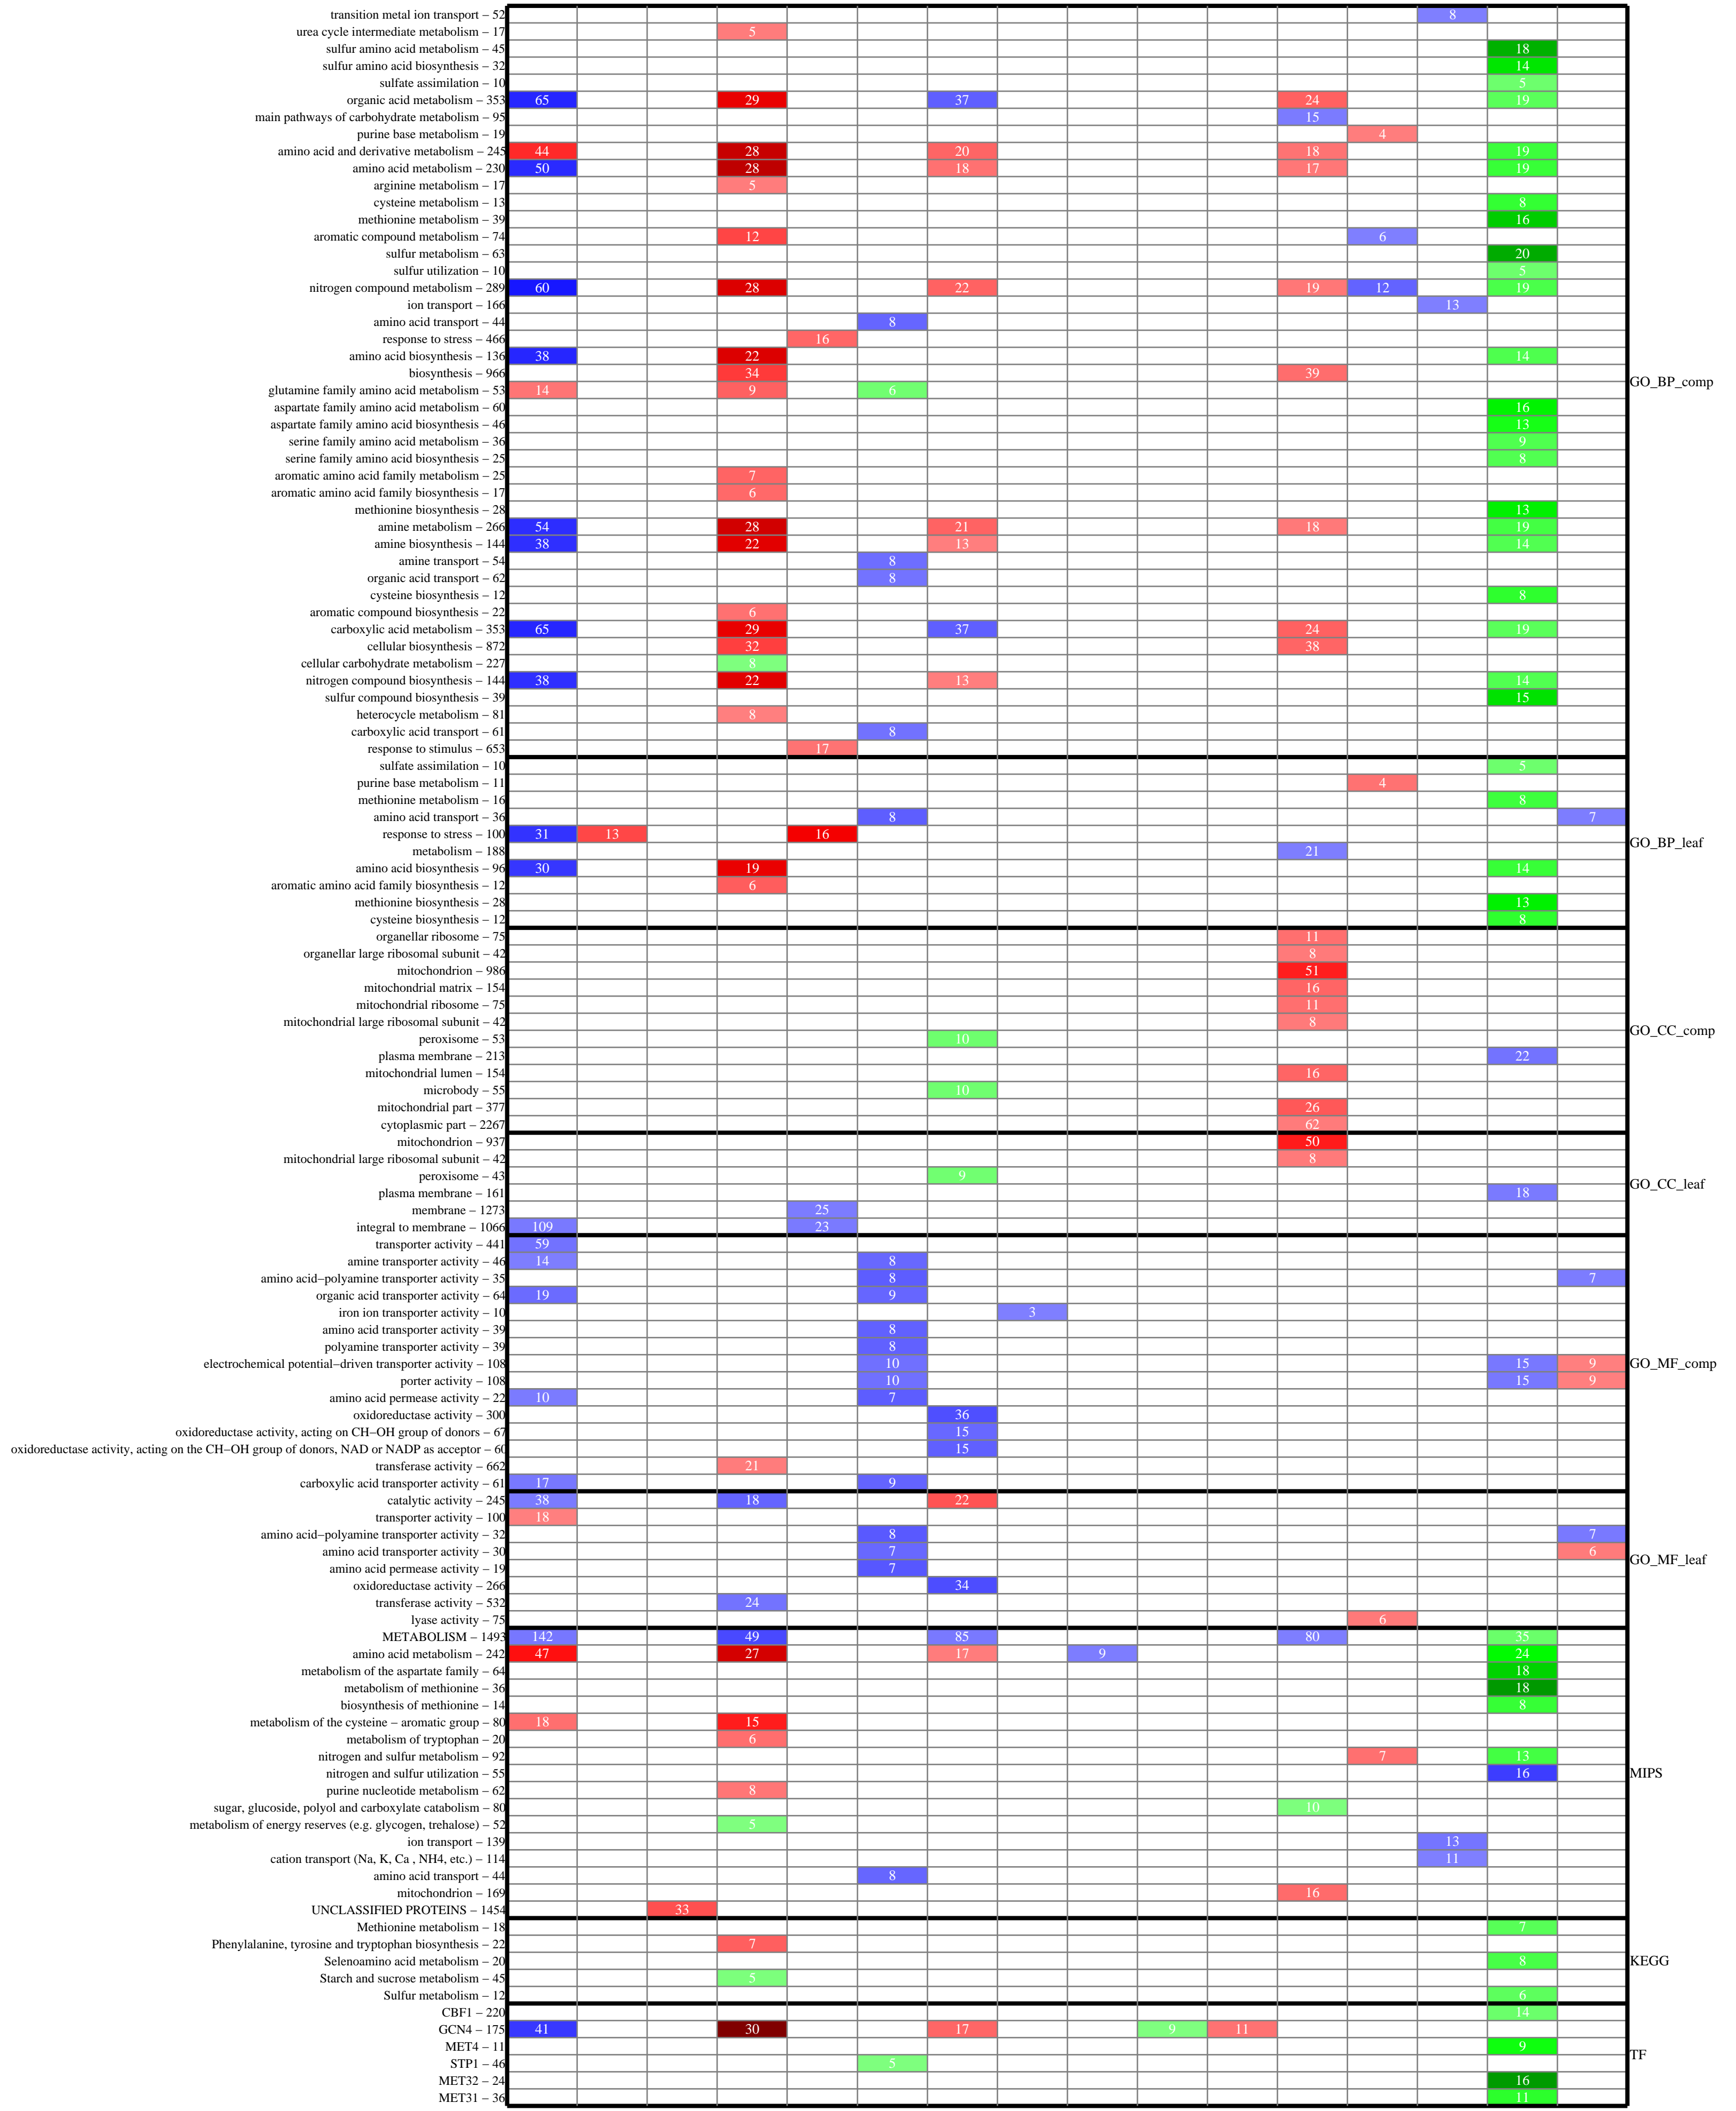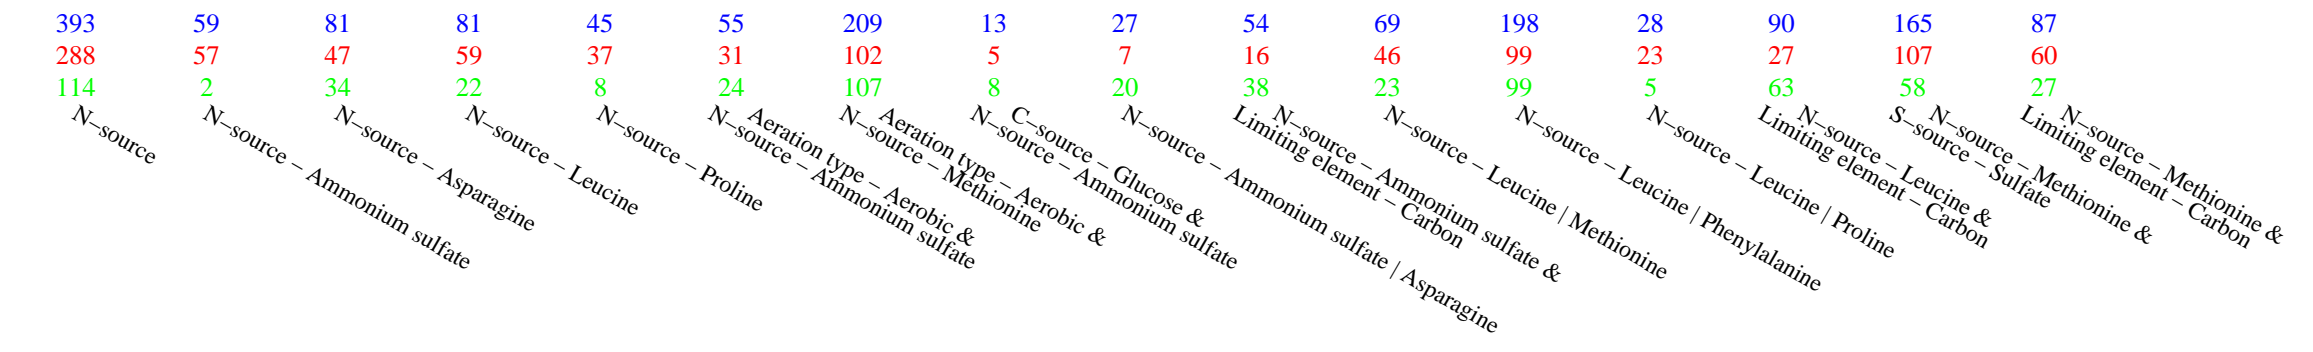





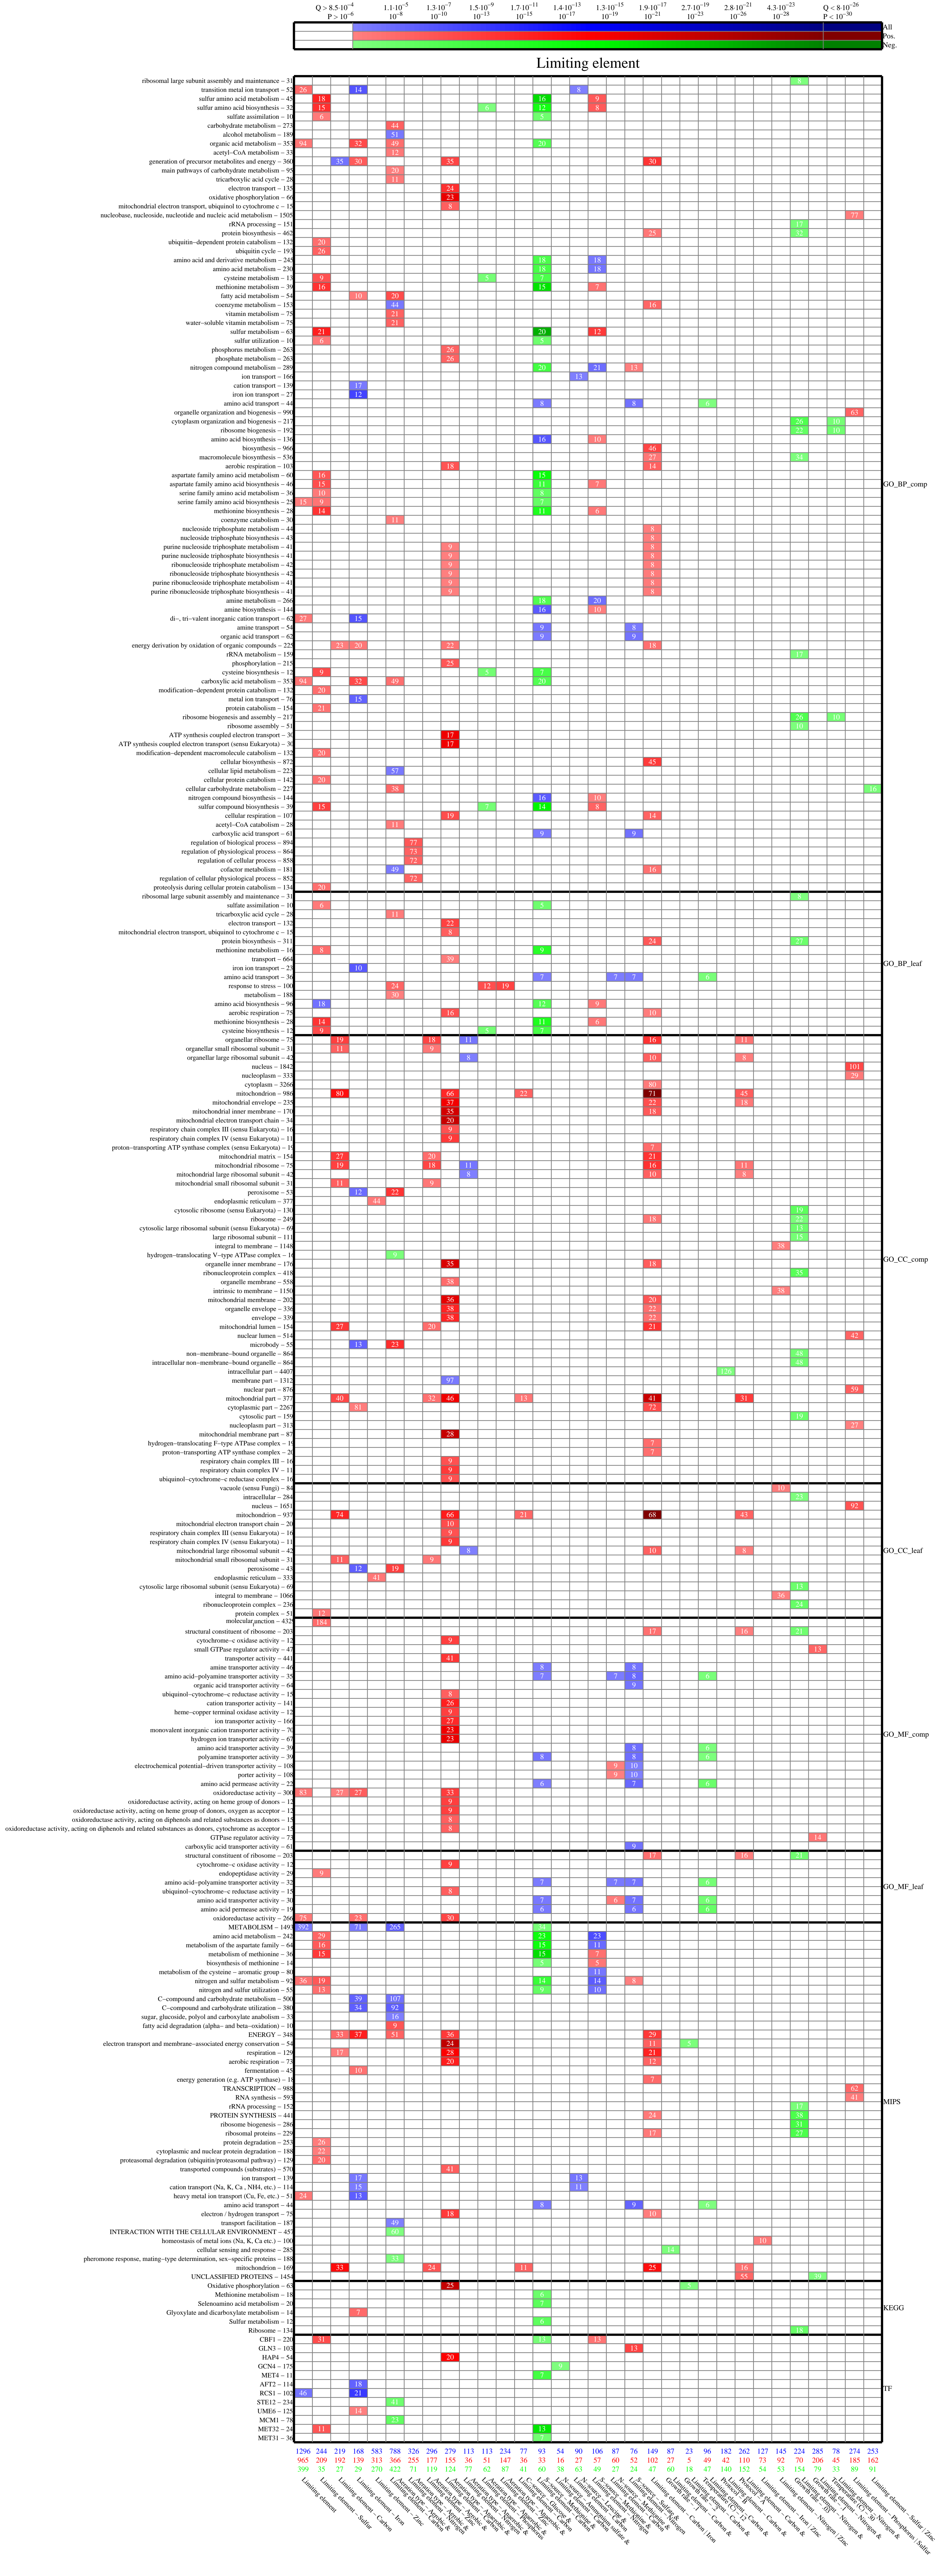



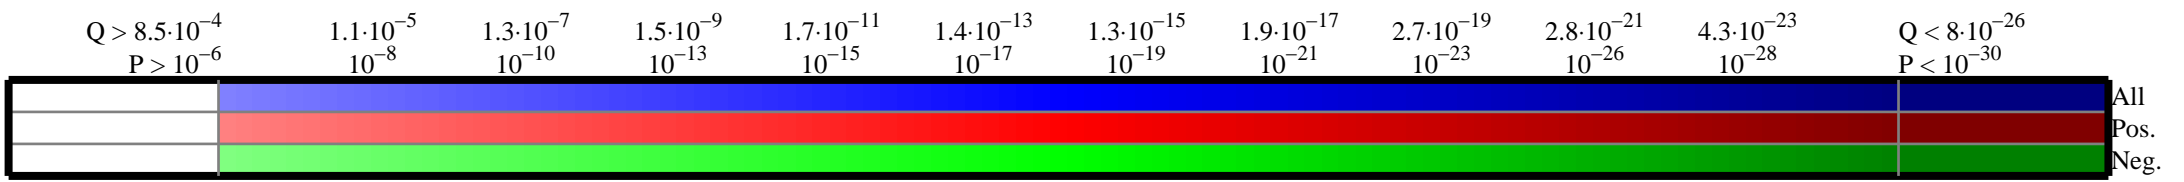

### Growth rate

|                                                                     | Q > 8.5·10 <sup>-4</sup><br>P > 10 <sup>-6</sup> | 1.1·10 <sup>-5</sup><br>10 <sup>-8</sup> | 1.3·10 <sup>-7</sup><br>10 <sup>-10</sup> | 1.5·10 <sup>-9</sup><br>10 <sup>-13</sup> | 1.7·10 <sup>-11</sup><br>10 <sup>-15</sup> | 1.4·10 <sup>-13</sup><br>10 <sup>-17</sup> | 1.3·10 <sup>-15</sup><br>10 <sup>-19</sup> | 1.9·10 <sup>-17</sup><br>10 <sup>-21</sup> | 2.7·10 <sup>-19</sup><br>10 <sup>-23</sup> | 2.8·10 <sup>-21</sup><br>10 <sup>-26</sup> | 4.3·10 <sup>-23</sup><br>10 <sup>-28</sup> | Q < 8·10 <sup>-26</sup><br>P < 10 <sup>-30</sup> |            |
|---------------------------------------------------------------------|--------------------------------------------------|------------------------------------------|-------------------------------------------|-------------------------------------------|--------------------------------------------|--------------------------------------------|--------------------------------------------|--------------------------------------------|--------------------------------------------|--------------------------------------------|--------------------------------------------|--------------------------------------------------|------------|
| ribosomal large subunit assembly and maintenance – 31               |                                                  |                                          |                                           |                                           |                                            | 8                                          |                                            |                                            |                                            |                                            |                                            |                                                  |            |
| carbohydrate metabolism – 273                                       |                                                  | 36                                       |                                           |                                           |                                            |                                            |                                            |                                            |                                            |                                            |                                            | 21                                               |            |
| generation of precursor metabolites and energy – 360                |                                                  |                                          |                                           |                                           |                                            |                                            |                                            | 27                                         |                                            |                                            |                                            |                                                  |            |
| electron transport – 135                                            |                                                  |                                          |                                           |                                           |                                            |                                            |                                            | 16                                         |                                            |                                            |                                            |                                                  |            |
| oxidative phosphorylation – 66                                      |                                                  |                                          |                                           |                                           |                                            |                                            |                                            | 12                                         |                                            |                                            |                                            |                                                  |            |
| rRNA processing – 151                                               |                                                  |                                          |                                           |                                           | 17                                         |                                            |                                            |                                            |                                            |                                            |                                            | 22                                               |            |
| protein biosynthesis – 462                                          |                                                  | 39                                       |                                           |                                           | 32                                         |                                            |                                            |                                            |                                            |                                            |                                            | 51                                               |            |
| protein amino acid phosphorylation – 136                            | 28                                               | 24                                       |                                           |                                           |                                            |                                            |                                            |                                            |                                            |                                            |                                            |                                                  |            |
| nitrogen compound metabolism – 289                                  |                                                  |                                          |                                           |                                           |                                            |                                            |                                            |                                            |                                            |                                            |                                            | 29                                               |            |
| cytoplasm organization and biogenesis – 217                         |                                                  |                                          |                                           |                                           | 26                                         |                                            |                                            |                                            |                                            |                                            |                                            | 33                                               |            |
| ribosome biogenesis – 192                                           |                                                  |                                          |                                           |                                           | 22                                         |                                            |                                            |                                            |                                            |                                            |                                            | 26                                               |            |
| physiological process – 4378                                        |                                                  |                                          |                                           |                                           |                                            |                                            |                                            |                                            |                                            |                                            |                                            | 198                                              |            |
| biological process – 447                                            |                                                  |                                          |                                           |                                           |                                            |                                            |                                            |                                            |                                            |                                            |                                            | 198                                              |            |
| metabolism – 3258                                                   |                                                  |                                          |                                           |                                           |                                            |                                            |                                            |                                            |                                            |                                            |                                            | 175                                              |            |
| biosynthesis – 966                                                  |                                                  | 64                                       |                                           |                                           |                                            |                                            |                                            |                                            |                                            |                                            |                                            | 87                                               |            |
| macromolecule biosynthesis – 536                                    |                                                  | 40                                       |                                           |                                           | 34                                         |                                            |                                            |                                            |                                            |                                            |                                            | 52                                               |            |
| aerobic respiration – 103                                           |                                                  |                                          |                                           |                                           |                                            |                                            |                                            | 14                                         |                                            |                                            |                                            |                                                  |            |
| cellular process – 4324                                             |                                                  |                                          |                                           |                                           |                                            |                                            |                                            |                                            |                                            |                                            |                                            | 195                                              | GO_BP_comp |
| rRNA metabolism – 159                                               |                                                  |                                          |                                           |                                           | 17                                         |                                            |                                            |                                            |                                            |                                            |                                            | 23                                               |            |
| phosphorylation – 215                                               | 37                                               | 31                                       |                                           |                                           |                                            |                                            |                                            |                                            |                                            |                                            |                                            |                                                  |            |
| protein metabolism – 1273                                           |                                                  |                                          |                                           |                                           |                                            |                                            |                                            |                                            |                                            |                                            |                                            | 86                                               |            |
| ribosome biogenesis and assembly – 217                              |                                                  |                                          |                                           |                                           | 26                                         |                                            |                                            |                                            |                                            |                                            |                                            | 33                                               |            |
| ribosome assembly – 51                                              |                                                  |                                          |                                           |                                           | 10                                         |                                            |                                            |                                            |                                            |                                            |                                            |                                                  |            |
| ATP synthesis coupled electron transport – 30                       |                                                  |                                          |                                           |                                           |                                            |                                            |                                            | 8                                          |                                            |                                            |                                            |                                                  |            |
| ATP synthesis coupled electron transport (sensu Eukaryota) – 30     |                                                  |                                          |                                           |                                           |                                            |                                            |                                            | 8                                          |                                            |                                            |                                            |                                                  |            |
| cellular metabolism – 3126                                          |                                                  |                                          |                                           |                                           |                                            |                                            |                                            |                                            |                                            |                                            |                                            | 170                                              |            |
| primary metabolism – 2988                                           |                                                  |                                          |                                           |                                           |                                            |                                            |                                            |                                            |                                            |                                            |                                            | 159                                              |            |
| cellular biosynthesis – 872                                         |                                                  | 59                                       |                                           |                                           |                                            |                                            |                                            |                                            |                                            |                                            |                                            | 82                                               | 23         |
| cellular macromolecule metabolism – 1207                            |                                                  |                                          |                                           |                                           |                                            |                                            |                                            |                                            |                                            |                                            |                                            | 77                                               |            |
| cellular carbohydrate metabolism – 227                              |                                                  | 33                                       |                                           |                                           |                                            |                                            |                                            |                                            |                                            |                                            |                                            |                                                  |            |
| cellular protein metabolism – 1157                                  |                                                  |                                          |                                           |                                           |                                            |                                            |                                            |                                            |                                            |                                            |                                            | 77                                               |            |
| cellular respiration – 107                                          |                                                  |                                          |                                           |                                           |                                            |                                            |                                            | 14                                         |                                            |                                            |                                            |                                                  |            |
| cellular physiological process – 4294                               |                                                  |                                          |                                           |                                           |                                            |                                            |                                            |                                            |                                            |                                            |                                            | 195                                              |            |
| response to stimulus – 653                                          |                                                  | 66                                       |                                           |                                           |                                            |                                            |                                            |                                            |                                            |                                            |                                            |                                                  |            |
| ribosomal large subunit assembly and maintenance – 31               |                                                  |                                          |                                           |                                           | 8                                          |                                            |                                            |                                            |                                            |                                            |                                            |                                                  |            |
| electron transport – 132                                            |                                                  |                                          |                                           |                                           |                                            |                                            |                                            | 15                                         |                                            |                                            |                                            |                                                  |            |
| protein biosynthesis – 311                                          |                                                  | 30                                       |                                           |                                           | 27                                         |                                            |                                            |                                            |                                            |                                            |                                            | 39                                               | GO_BP_leaf |
| protein amino acid phosphorylation – 136                            | 28                                               | 24                                       |                                           |                                           |                                            |                                            |                                            |                                            |                                            |                                            |                                            |                                                  |            |
| transport – 664                                                     |                                                  |                                          |                                           |                                           |                                            |                                            |                                            | 35                                         |                                            |                                            |                                            |                                                  |            |
| cellular component – 500                                            |                                                  |                                          |                                           |                                           |                                            |                                            |                                            |                                            |                                            |                                            |                                            | 215                                              |            |
| intracellular – 4444                                                |                                                  |                                          |                                           |                                           |                                            |                                            |                                            |                                            |                                            |                                            |                                            | 203                                              |            |
| cell – 4998                                                         |                                                  |                                          |                                           |                                           |                                            |                                            |                                            |                                            |                                            |                                            |                                            | 215                                              |            |
| nucleolus – 213                                                     |                                                  |                                          |                                           |                                           |                                            |                                            |                                            |                                            |                                            |                                            |                                            | 28                                               |            |
| cytoplasm – 3266                                                    |                                                  |                                          |                                           |                                           |                                            |                                            |                                            |                                            |                                            |                                            |                                            | 158                                              |            |
| mitochondrion – 986                                                 |                                                  |                                          |                                           |                                           |                                            |                                            |                                            | 45                                         |                                            |                                            |                                            |                                                  |            |
| mitochondrial inner membrane – 170                                  |                                                  |                                          |                                           |                                           |                                            |                                            |                                            | 17                                         |                                            |                                            |                                            |                                                  |            |
| mitochondrial electron transport chain – 34                         |                                                  |                                          |                                           |                                           |                                            |                                            |                                            | 11                                         |                                            |                                            |                                            |                                                  |            |
| endoplasmic reticulum – 377                                         |                                                  | 32                                       |                                           |                                           |                                            |                                            |                                            |                                            |                                            |                                            |                                            |                                                  |            |
| cytosol – 313                                                       |                                                  |                                          |                                           |                                           |                                            |                                            |                                            |                                            |                                            |                                            |                                            | 35                                               |            |
| cytosolic ribosome (sensu Eukaryota) – 130                          |                                                  | 26                                       |                                           |                                           | 19                                         |                                            |                                            |                                            |                                            |                                            |                                            | 26                                               |            |
| ribosome – 249                                                      |                                                  | 29                                       |                                           |                                           | 22                                         |                                            |                                            |                                            |                                            |                                            |                                            | 33                                               |            |
| cytosolic large ribosomal subunit (sensu Eukaryota) – 69            | 20                                               | 20                                       |                                           |                                           | 13                                         |                                            |                                            |                                            |                                            |                                            |                                            | 18                                               | GO_CC_comp |
| large ribosomal subunit – 111                                       |                                                  | 20                                       |                                           |                                           | 15                                         |                                            |                                            |                                            |                                            |                                            |                                            | 18                                               |            |
| organelle inner membrane – 176                                      |                                                  |                                          |                                           |                                           |                                            |                                            |                                            | 17                                         |                                            |                                            |                                            |                                                  |            |
| ribonucleoprotein complex – 418                                     |                                                  | 36                                       |                                           |                                           | 35                                         |                                            |                                            |                                            |                                            |                                            |                                            | 49                                               |            |
| mitochondrial membrane – 202                                        |                                                  |                                          |                                           |                                           |                                            |                                            |                                            | 18                                         |                                            |                                            |                                            |                                                  |            |
| non-membrane-bound organelle – 864                                  |                                                  |                                          |                                           |                                           | 48                                         |                                            |                                            |                                            |                                            |                                            |                                            | 62                                               |            |
| intracellular non-membrane-bound organelle – 864                    |                                                  |                                          |                                           |                                           | 48                                         |                                            |                                            |                                            |                                            |                                            |                                            | 62                                               |            |
| protein complex – 1400                                              |                                                  |                                          |                                           |                                           |                                            |                                            |                                            |                                            |                                            |                                            |                                            | 87                                               |            |
| intracellular part – 4407                                           |                                                  |                                          |                                           |                                           |                                            |                                            |                                            |                                            |                                            |                                            |                                            | 201                                              |            |
| cytosolic part – 159                                                |                                                  | 26                                       |                                           |                                           | 19                                         |                                            |                                            |                                            |                                            |                                            |                                            | 29                                               |            |
| mitochondrial membrane part – 87                                    |                                                  |                                          |                                           |                                           |                                            |                                            |                                            | 14                                         |                                            |                                            |                                            |                                                  |            |
| cell part – 4998                                                    |                                                  |                                          |                                           |                                           |                                            |                                            |                                            |                                            |                                            |                                            |                                            | 215                                              |            |
| intracellular – 284                                                 |                                                  | 28                                       |                                           |                                           | 23                                         |                                            |                                            |                                            |                                            |                                            |                                            | 37                                               |            |
| mitochondrion – 937                                                 |                                                  |                                          |                                           |                                           |                                            |                                            |                                            | 45                                         |                                            |                                            |                                            |                                                  |            |
| ribosome – 184                                                      |                                                  | 27                                       |                                           |                                           |                                            |                                            |                                            |                                            |                                            |                                            |                                            | 30                                               | GO_CC_leaf |
| cytosolic large ribosomal subunit (sensu Eukaryota) – 69            | 20                                               | 20                                       |                                           |                                           | 13                                         |                                            |                                            |                                            |                                            |                                            |                                            | 18                                               |            |
| ribonucleoprotein complex – 236                                     |                                                  | 31                                       |                                           |                                           | 24                                         |                                            |                                            |                                            |                                            |                                            |                                            | 32                                               |            |
| nucleotide binding – 709                                            | 84                                               |                                          |                                           |                                           |                                            |                                            |                                            |                                            |                                            |                                            |                                            |                                                  |            |
| molecular function – 432                                            |                                                  |                                          |                                           |                                           |                                            |                                            |                                            |                                            |                                            |                                            |                                            | 194                                              |            |
| transcription factor activity – 131                                 |                                                  | 22                                       |                                           |                                           |                                            |                                            |                                            |                                            |                                            |                                            |                                            |                                                  |            |
| structural constituent of ribosome – 203                            |                                                  | 27                                       |                                           |                                           | 21                                         |                                            |                                            |                                            |                                            |                                            |                                            | 29                                               |            |
| protein kinase activity – 137                                       | 31                                               | 26                                       |                                           |                                           |                                            |                                            |                                            |                                            |                                            |                                            |                                            |                                                  |            |
| protein serine/threonine kinase activity – 124                      | 29                                               | 24                                       |                                           |                                           |                                            |                                            |                                            |                                            |                                            |                                            |                                            |                                                  |            |
| small GTPase regulator activity – 47                                |                                                  |                                          |                                           |                                           |                                            |                                            |                                            | 13                                         |                                            |                                            |                                            |                                                  |            |
| structural molecule activity – 325                                  |                                                  |                                          |                                           |                                           |                                            |                                            |                                            |                                            |                                            |                                            |                                            | 32                                               |            |
| binding – 3149                                                      |                                                  | 204                                      |                                           |                                           |                                            |                                            |                                            |                                            |                                            |                                            |                                            |                                                  | GO_MF_comp |
| iron ion binding – 98                                               |                                                  |                                          |                                           |                                           |                                            |                                            |                                            | 12                                         |                                            |                                            |                                            |                                                  |            |
| ATP binding – 524                                                   | 74                                               | 55                                       |                                           |                                           |                                            |                                            |                                            |                                            |                                            |                                            |                                            |                                                  |            |
| kinase activity – 219                                               | 37                                               | 32                                       |                                           |                                           |                                            |                                            |                                            |                                            |                                            |                                            |                                            |                                                  |            |
| oxidoreductase activity – 300                                       |                                                  |                                          |                                           |                                           |                                            |                                            |                                            | 35                                         |                                            |                                            |                                            |                                                  |            |
| phosphotransferase activity, alcohol group as acceptor – 188        | 38                                               | 33                                       |                                           |                                           |                                            |                                            |                                            |                                            |                                            |                                            |                                            |                                                  |            |
| purine nucleotide binding – 630                                     | 80                                               |                                          |                                           |                                           |                                            |                                            |                                            |                                            |                                            |                                            |                                            |                                                  |            |
| adenyl nucleotide binding – 546                                     | 76                                               | 56                                       |                                           |                                           |                                            |                                            |                                            |                                            |                                            |                                            |                                            |                                                  |            |
| GTPase regulator activity – 73                                      |                                                  |                                          |                                           |                                           |                                            |                                            |                                            | 14                                         |                                            |                                            |                                            |                                                  |            |
| nucleotide binding – 641                                            | 79                                               |                                          |                                           |                                           |                                            |                                            |                                            |                                            |                                            |                                            |                                            |                                                  |            |
| DNA binding – 435                                                   |                                                  | 47                                       |                                           |                                           |                                            |                                            |                                            |                                            |                                            |                                            |                                            |                                                  |            |
| transcription factor activity – 131                                 |                                                  | 22                                       |                                           |                                           |                                            |                                            |                                            |                                            |                                            |                                            |                                            |                                                  |            |
| structural constituent of ribosome – 203                            |                                                  | 27                                       |                                           |                                           | 21                                         |                                            |                                            |                                            |                                            |                                            |                                            | 29                                               |            |
| protein kinase activity – 126                                       | 31                                               | 26                                       |                                           |                                           |                                            |                                            |                                            |                                            |                                            |                                            |                                            |                                                  |            |
| protein serine/threonine kinase activity – 120                      | 29                                               | 24                                       |                                           |                                           |                                            |                                            |                                            |                                            |                                            |                                            |                                            |                                                  | GO_MF_leaf |
| iron ion binding – 97                                               |                                                  |                                          |                                           |                                           |                                            |                                            |                                            | 12                                         |                                            |                                            |                                            |                                                  |            |
| ATP binding – 524                                                   | 74                                               | 55                                       |                                           |                                           |                                            |                                            |                                            |                                            |                                            |                                            |                                            |                                                  |            |
| kinase activity – 197                                               | 36                                               | 31                                       |                                           |                                           |                                            |                                            |                                            |                                            |                                            |                                            |                                            |                                                  |            |
| oxidoreductase activity – 266                                       |                                                  |                                          |                                           |                                           |                                            |                                            |                                            | 29                                         |                                            |                                            |                                            |                                                  |            |
| METABOLISM – 1493                                                   | 159                                              | 122                                      |                                           |                                           |                                            |                                            |                                            |                                            |                                            |                                            |                                            |                                                  |            |
| phosphate metabolism – 412                                          | 59                                               | 49                                       |                                           |                                           |                                            |                                            |                                            |                                            |                                            |                                            |                                            |                                                  |            |
| phosphate utilization – 393                                         | 57                                               | 47                                       |                                           |                                           |                                            |                                            |                                            |                                            |                                            |                                            |                                            |                                                  |            |
| ENERGY – 348                                                        | 92                                               | 42                                       |                                           |                                           |                                            |                                            |                                            | 30                                         |                                            |                                            |                                            |                                                  |            |
| electron transport and membrane-associated energy conservation – 54 |                                                  |                                          |                                           | 5                                         |                                            |                                            |                                            | 13                                         |                                            |                                            |                                            |                                                  |            |
| respiration – 129                                                   |                                                  |                                          |                                           |                                           |                                            |                                            |                                            | 17                                         |                                            |                                            |                                            |                                                  |            |
| aerobic respiration – 73                                            |                                                  |                                          |                                           |                                           |                                            |                                            |                                            | 11                                         |                                            |                                            |                                            |                                                  |            |
| rRNA processing – 152                                               |                                                  |                                          |                                           |                                           | 17                                         |                                            |                                            |                                            |                                            |                                            |                                            | 20                                               |            |
| PROTEIN SYNTHESIS – 441                                             |                                                  |                                          |                                           |                                           | 38                                         |                                            |                                            |                                            |                                            |                                            |                                            | 50                                               |            |
| ribosome biogenesis – 286                                           |                                                  | 30                                       |                                           |                                           | 31                                         |                                            |                                            |                                            |                                            |                                            |                                            | 39                                               |            |
| ribosomal proteins – 229                                            |                                                  | 29                                       |                                           |                                           | 27                                         |                                            |                                            |                                            |                                            |                                            |                                            | 32                                               | MIPS       |
| transported compounds (substrates) – 570                            |                                                  |                                          |                                           |                                           |                                            |                                            |                                            | 33                                         |                                            |                                            |                                            |                                                  |            |
| electron / hydrogen transport – 75                                  |                                                  |                                          |                                           |                                           |                                            |                                            |                                            | 11                                         |                                            |                                            |                                            |                                                  |            |
| CELL RESCUE, DEFENSE AND VIRULENCE – 538                            |                                                  | 55                                       |                                           |                                           |                                            |                                            |                                            |                                            |                                            |                                            |                                            |                                                  |            |
| cellular sensing and response – 285                                 |                                                  |                                          | 14                                        |                                           |                                            |                                            |                                            |                                            |                                            |                                            |                                            |                                                  |            |
| CELL TYPE DIFFERENTIATION – 450                                     |                                                  |                                          |                                           |                                           |                                            |                                            |                                            |                                            |                                            |                                            | 19                                         |                                                  |            |
| fungal/microorganismic cell type differentiation – 450              |                                                  |                                          |                                           |                                           |                                            |                                            |                                            |                                            |                                            |                                            | 19                                         |                                                  |            |
| fungal and other eukaryotic cell type differentiation – 450         |                                                  |                                          |                                           |                                           |                                            |                                            |                                            |                                            |                                            |                                            | 19                                         |                                                  |            |
| budding, cell polarity and filament formation – 312                 |                                                  |                                          |                                           |                                           |                                            |                                            |                                            |                                            |                                            |                                            | 17                                         |                                                  |            |
| UNCLASSIFIED PROTEINS – 1454                                        |                                                  |                                          |                                           |                                           |                                            |                                            |                                            | 39                                         |                                            |                                            |                                            |                                                  |            |
| Oxidative phosphorylation – 63                                      |                                                  |                                          |                                           | 5                                         |                                            |                                            |                                            | 13                                         |                                            |                                            |                                            |                                                  |            |
| Pyruvate metabolism – 33                                            |                                                  |                                          |                                           |                                           |                                            |                                            |                                            | 8                                          |                                            |                                            |                                            |                                                  | KEGG       |
| Ribosome – 134                                                      |                                                  | 27                                       |                                           |                                           | 18                                         |                                            |                                            |                                            |                                            |                                            |                                            | 29                                               |            |
| FHL1 – 163                                                          |                                                  | 22                                       |                                           |                                           |                                            |                                            |                                            |                                            |                                            |                                            |                                            | 21                                               | TF         |

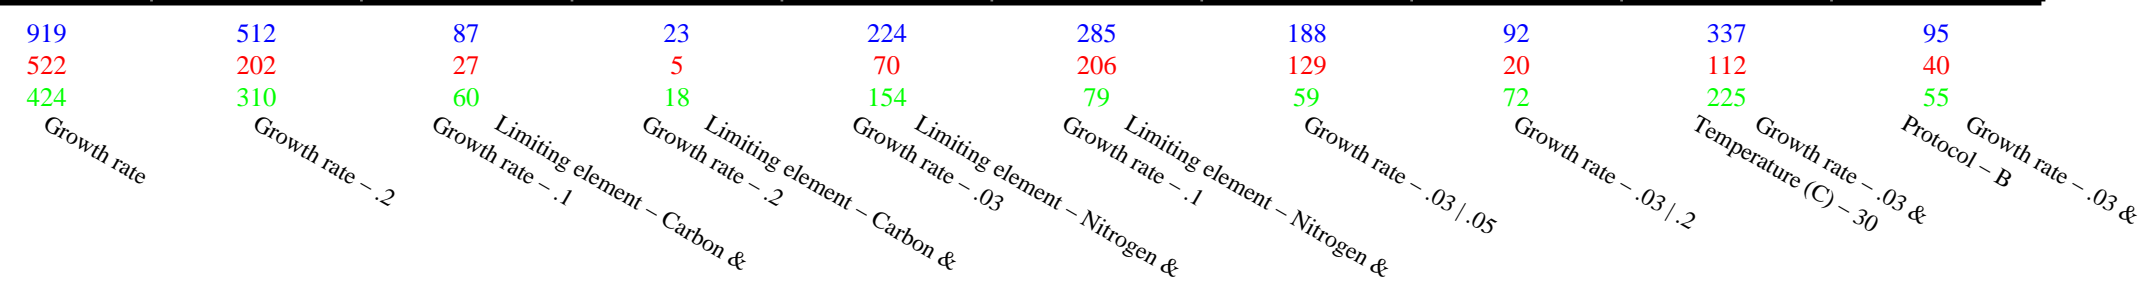

$Q > 8.5 \cdot 10^{-4}$      $1.1 \cdot 10^{-5}$      $1.3 \cdot 10^{-7}$      $1.5 \cdot 10^{-9}$      $1.7 \cdot 10^{-11}$      $1.4 \cdot 10^{-13}$      $1.3 \cdot 10^{-15}$      $1.9 \cdot 10^{-17}$      $2.7 \cdot 10^{-19}$      $2.8 \cdot 10^{-21}$      $4.3 \cdot 10^{-23}$      $Q < 8 \cdot 10^{-26}$   
 $P > 10^{-6}$      $10^{-8}$      $10^{-10}$      $10^{-13}$      $10^{-15}$      $10^{-17}$      $10^{-19}$      $10^{-21}$      $10^{-23}$      $10^{-26}$      $10^{-28}$      $P < 10^{-30}$

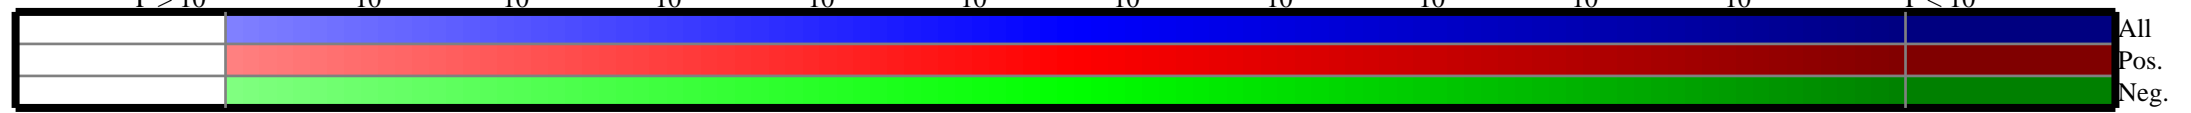

### Temperature (C)

| Biological Process                                       | Count | Color | Category   |
|----------------------------------------------------------|-------|-------|------------|
| carbohydrate metabolism – 273                            |       | White |            |
| rRNA processing – 151                                    | 43    | Red   |            |
| protein biosynthesis – 462                               | 99    | Red   |            |
| nitrogen compound metabolism – 289                       |       | White |            |
| amino acid transport – 44                                |       | White |            |
| cytoplasm organization and biogenesis – 217              | 65    | Red   |            |
| ribosome biogenesis – 192                                | 57    | Red   |            |
| physiological process – 4378                             |       | White |            |
| biological process – 447                                 |       | White |            |
| metabolism – 3258                                        |       | White |            |
| biosynthesis – 966                                       |       | White |            |
| macromolecule biosynthesis – 536                         | 101   | Red   | GO_BP_comp |
| cellular process – 4324                                  |       | White |            |
| rRNA metabolism – 159                                    | 44    | Red   |            |
| protein metabolism – 1273                                |       | White |            |
| ribosome biogenesis and assembly – 217                   | 65    | Red   |            |
| ribosome assembly – 51                                   | 21    | Red   |            |
| cellular metabolism – 3126                               |       | White |            |
| primary metabolism – 2988                                |       | White |            |
| cellular biosynthesis – 872                              |       | White |            |
| cellular macromolecule metabolism – 1207                 |       | White |            |
| cellular protein metabolism – 1157                       |       | White |            |
| cellular physiological process – 4294                    |       | White |            |
| protein biosynthesis – 311                               | 73    | Red   |            |
| amino acid transport – 36                                |       | White |            |
| ribosome biogenesis – 68                                 | 27    | Red   | GO_BP_leaf |
| cellular component – 500                                 | 770   | Blue  |            |
| intracellular – 4444                                     |       | White |            |
| cell – 4998                                              |       | White |            |
| nucleolus – 213                                          | 65    | Red   |            |
| cytoplasm – 3266                                         |       | White |            |
| endoplasmic reticulum – 377                              | 80    | Red   |            |
| cytosol – 313                                            |       | White |            |
| cytosolic ribosome (sensu Eukaryota) – 130               | 39    | Red   |            |
| ribosome – 249                                           | 68    | Red   |            |
| cytosolic large ribosomal subunit (sensu Eukaryota) – 69 | 28    | Red   |            |
| large ribosomal subunit – 111                            | 41    | Red   |            |
| ribonucleoprotein complex – 418                          | 89    | Red   | GO_CC_comp |
| membrane-enclosed lumen – 711                            | 128   | Red   |            |
| nuclear lumen – 514                                      | 113   | Blue  |            |
| non-membrane-bound organelle – 864                       | 159   | Red   |            |
| intracellular non-membrane-bound organelle – 864         | 159   | Red   |            |
| organelle lumen – 711                                    | 128   | Red   |            |
| protein complex – 1400                                   |       | White |            |
| intracellular part – 4407                                |       | White |            |
| cytosolic part – 159                                     | 42    | Red   |            |
| cell part – 4998                                         |       | White |            |
| intracellular – 284                                      | 65    | Red   |            |
| nucleolus – 136                                          | 43    | Red   |            |
| endoplasmic reticulum – 333                              | 74    | Red   |            |
| ribosome – 184                                           | 59    | Red   | GO_CC_leaf |
| cytosolic large ribosomal subunit (sensu Eukaryota) – 69 | 28    | Red   |            |
| ribonucleoprotein complex – 236                          | 70    | Red   |            |
| molecular function – 432                                 |       | White |            |
| structural constituent of ribosome – 203                 | 61    | Red   |            |
| structural molecule activity – 325                       | 69    | Red   |            |
| amino acid-polyamine transporter activity – 35           |       | White |            |
| amino acid transporter activity – 39                     |       | White |            |
| polyamine transporter activity – 39                      |       | White |            |
| amino acid permease activity – 22                        |       | White |            |
| structural constituent of ribosome – 203                 | 61    | Red   |            |
| amino acid-polyamine transporter activity – 32           |       | White |            |
| amino acid transporter activity – 30                     |       | White |            |
| amino acid permease activity – 19                        |       | White |            |
| rRNA processing – 152                                    | 47    | Red   |            |
| PROTEIN SYNTHESIS – 441                                  | 110   | Red   |            |
| ribosome biogenesis – 286                                | 91    | Red   | MIPS       |
| ribosomal proteins – 229                                 | 69    | Red   |            |
| amino acid transport – 44                                |       | White |            |
| Ribosome – 134                                           | 43    | Red   | KEGG       |
| FHL1 – 163                                               |       | White | TF         |

867    96    78    337  
695    49    45    112  
172    47    33    225  
Temperature (C) – 12    Limiting element – Carbon &    Temperature (C) – 30    Limiting element – Nitrogen &    Temperature (C) – 30    Growth rate – .03 &

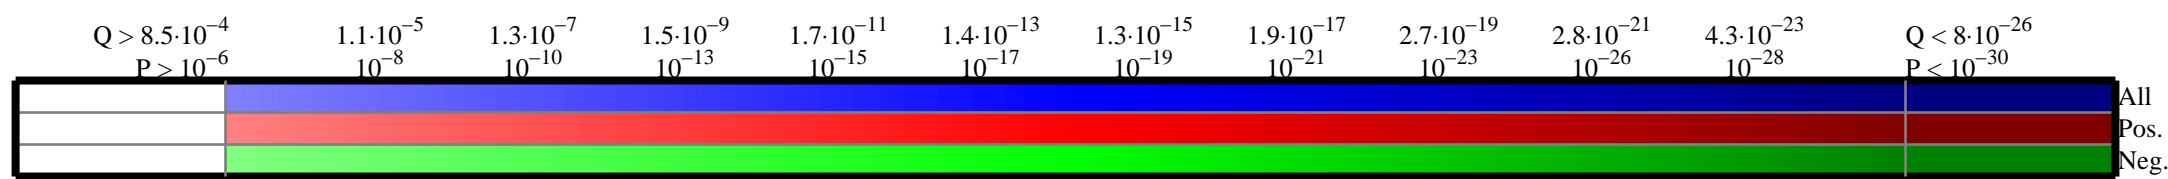

# pH

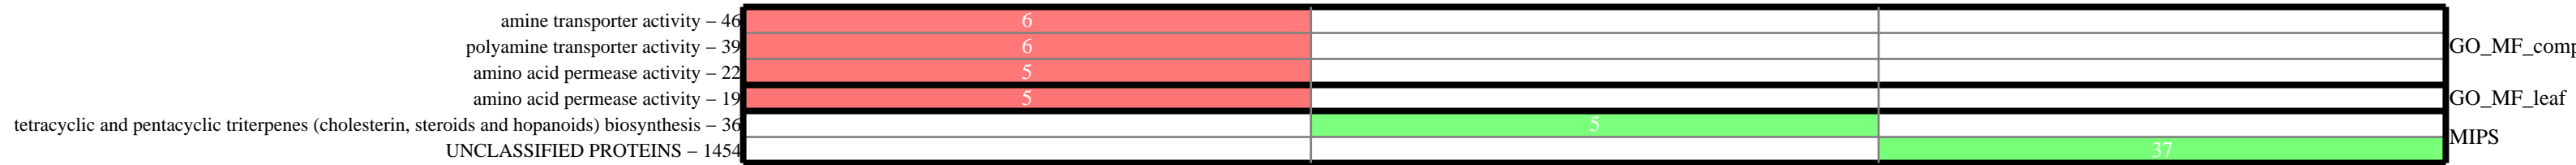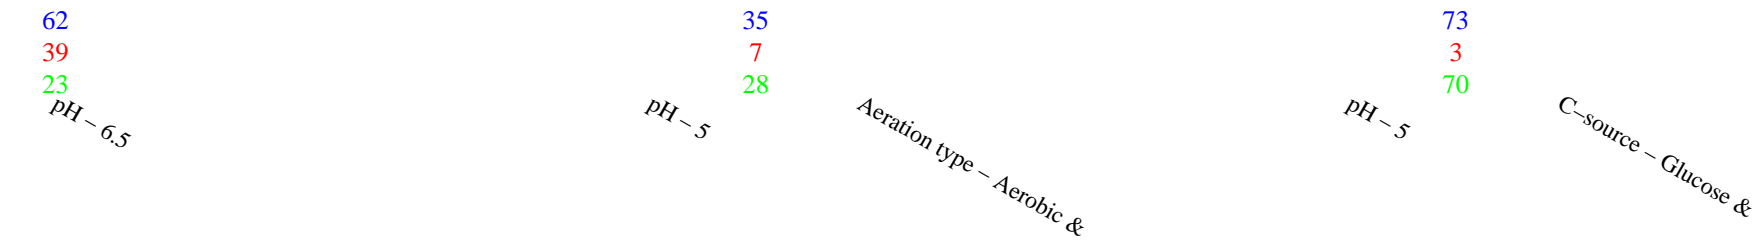

pH – 6.5    pH – 5    Aeration type – Aerobic &    pH – 5    C-source – Glucose &



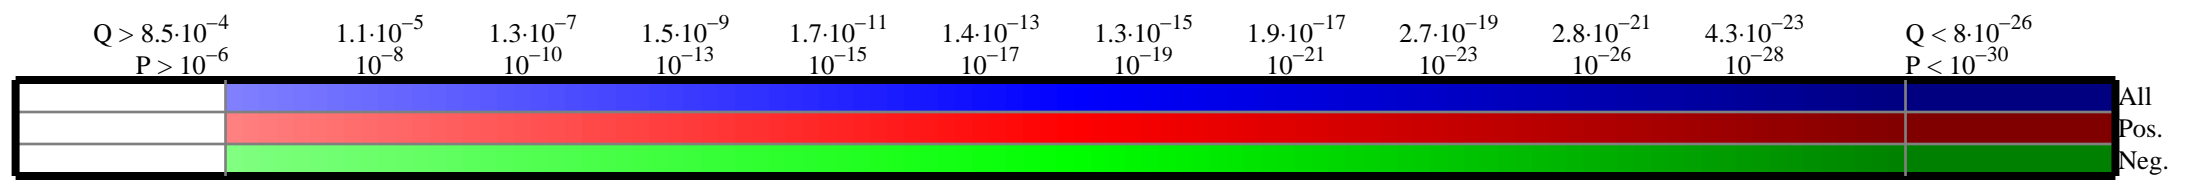

### Extra compound

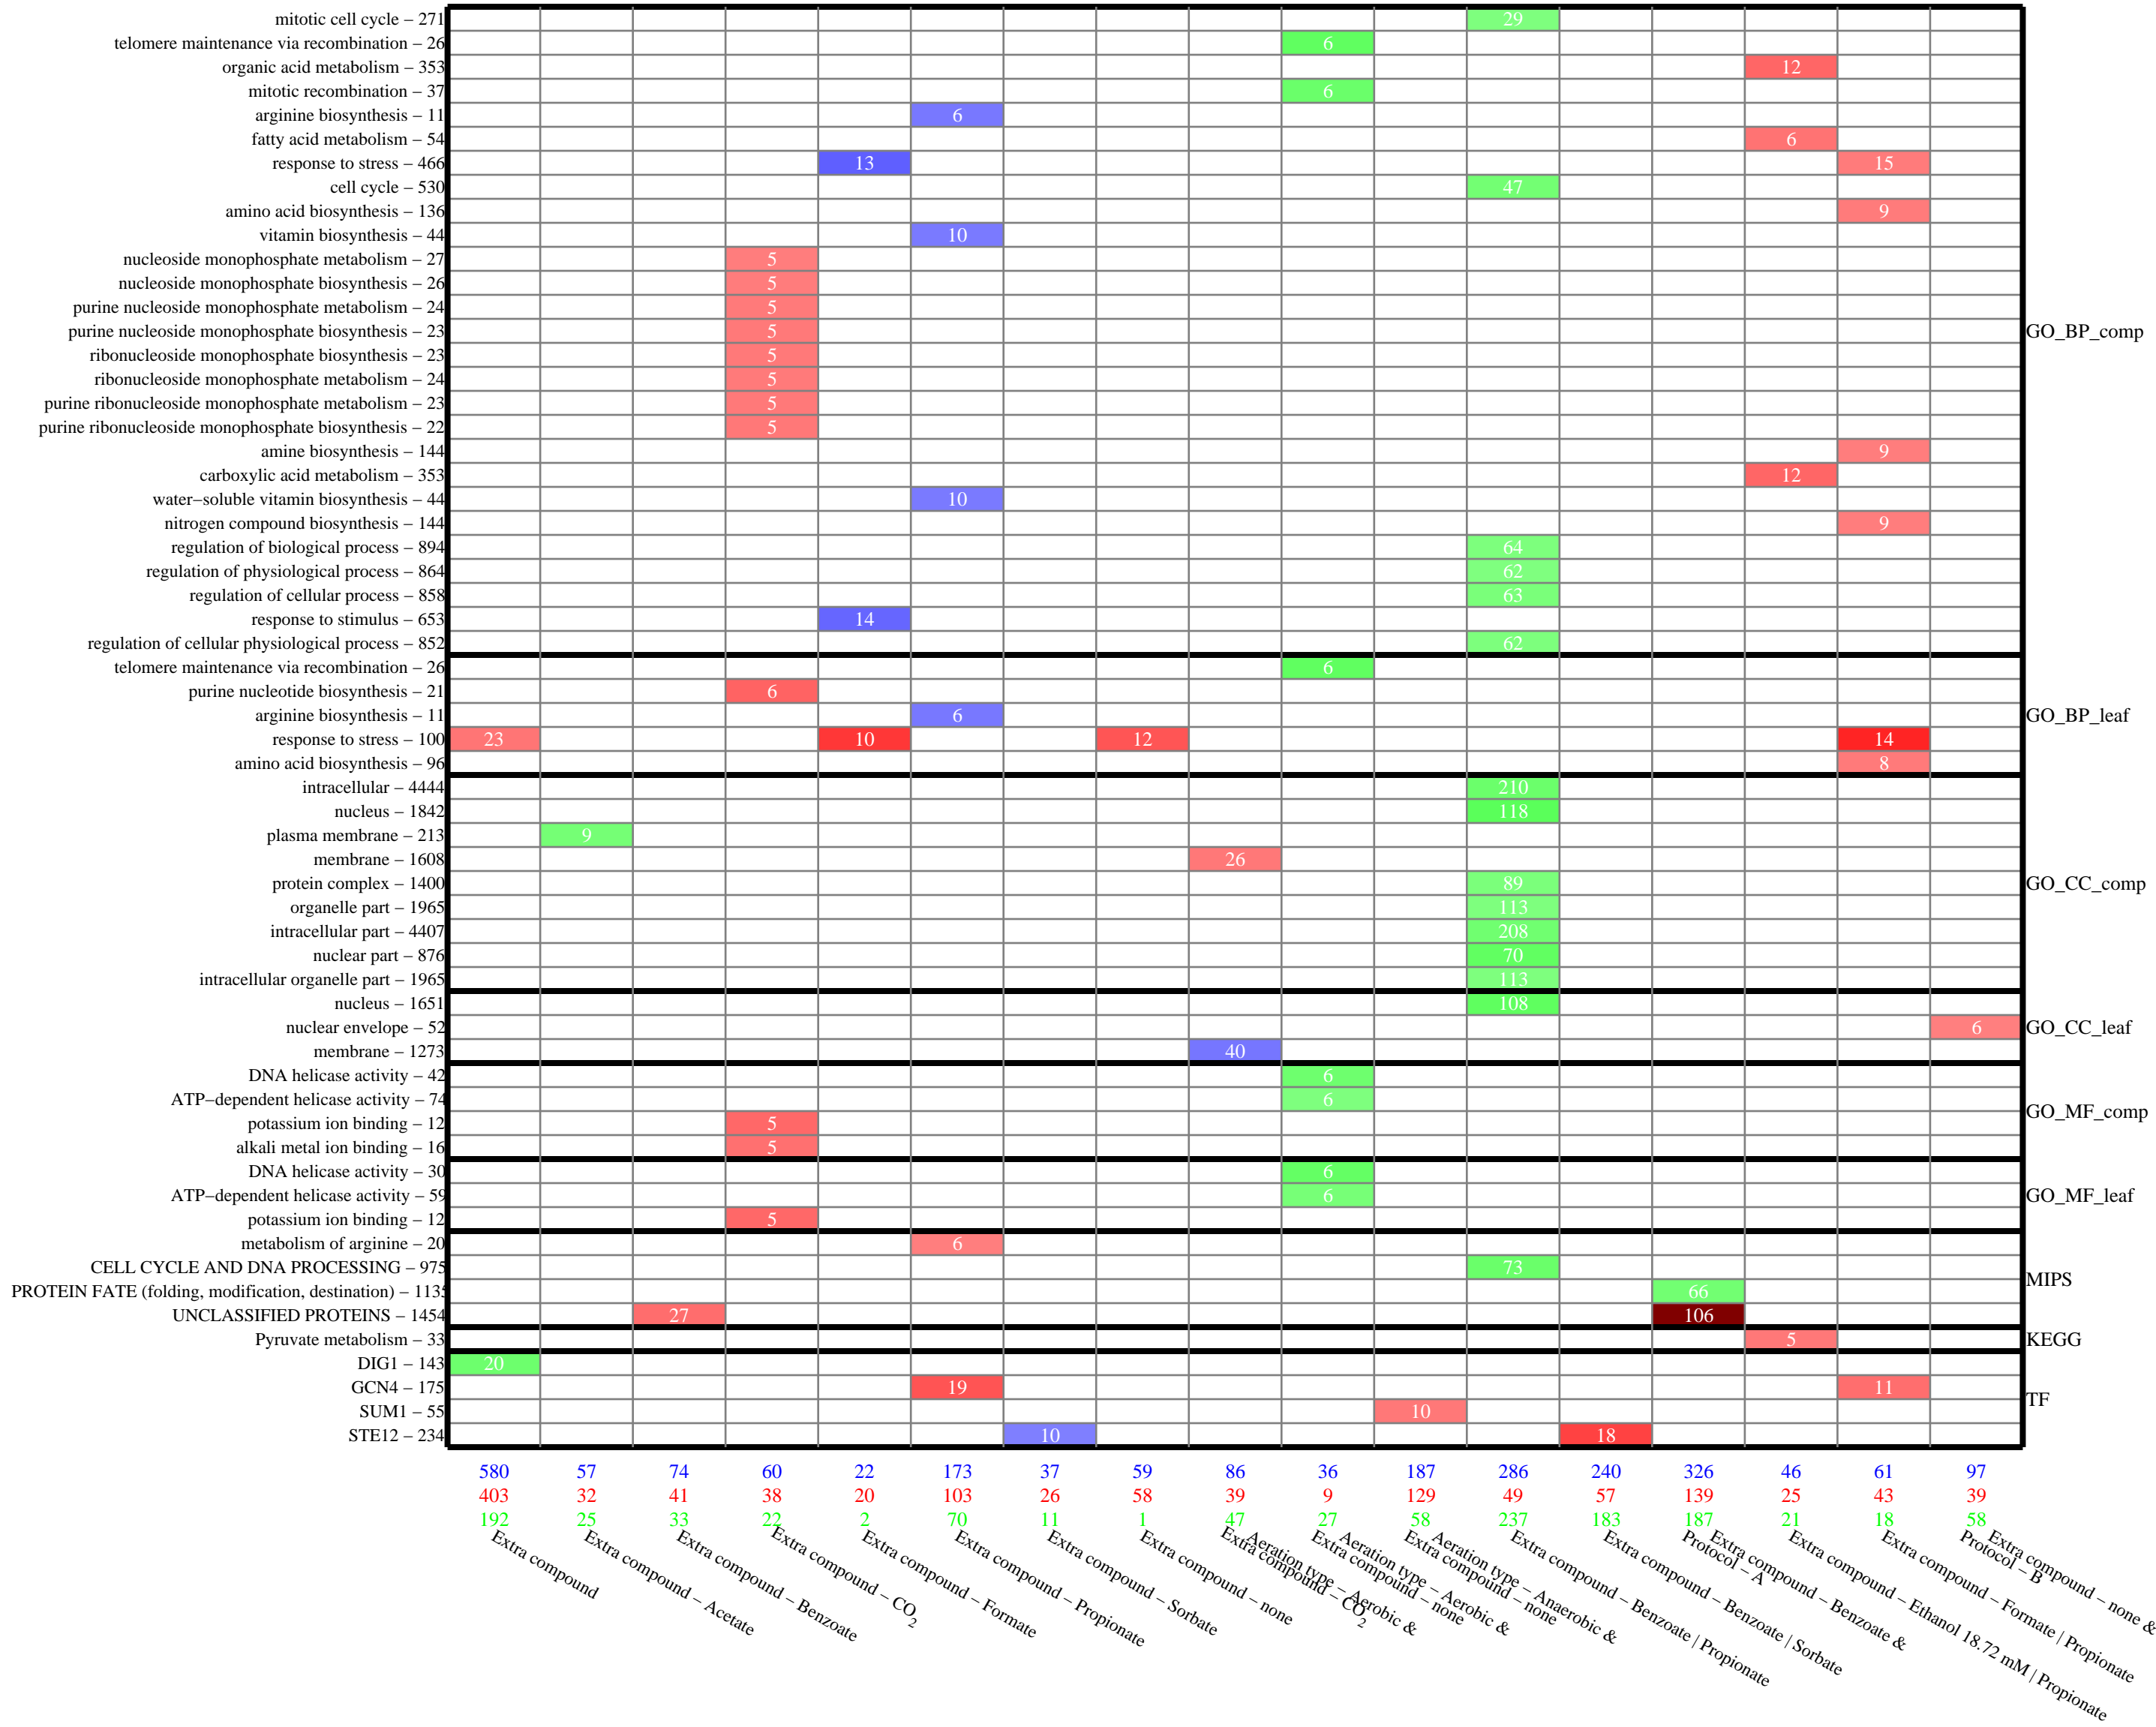

$Q > 8.5 \cdot 10^{-4}$      $1.1 \cdot 10^{-5}$      $1.3 \cdot 10^{-7}$      $1.5 \cdot 10^{-9}$      $1.7 \cdot 10^{-11}$      $1.4 \cdot 10^{-13}$      $1.3 \cdot 10^{-15}$      $1.9 \cdot 10^{-17}$      $2.7 \cdot 10^{-19}$      $2.8 \cdot 10^{-21}$      $4.3 \cdot 10^{-23}$      $Q < 8 \cdot 10^{-26}$   
 $P > 10^{-6}$      $10^{-8}$      $10^{-10}$      $10^{-13}$      $10^{-15}$      $10^{-17}$      $10^{-19}$      $10^{-21}$      $10^{-23}$      $10^{-26}$      $10^{-28}$      $P < 10^{-30}$

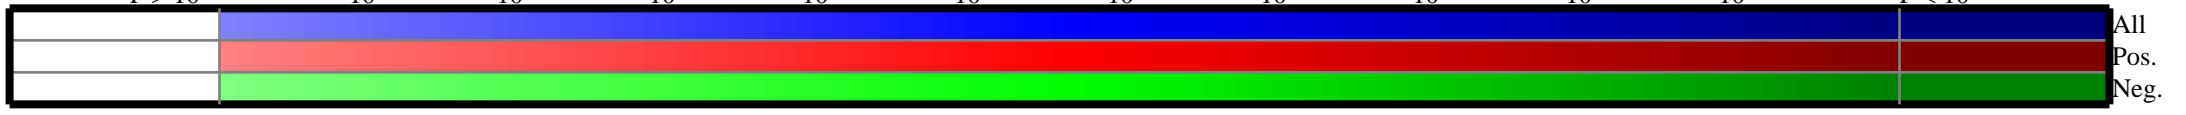

### Protocol

| GO Term                                                                               | Count | Protocol - A | Protocol - B | Protocol - C | Protocol - D | Protocol - E | Protocol - F | Protocol - G | Protocol - H |
|---------------------------------------------------------------------------------------|-------|--------------|--------------|--------------|--------------|--------------|--------------|--------------|--------------|
| organelle organization and biogenesis – 990                                           | 222   |              |              |              |              |              |              |              |              |
| physiological process – 4378                                                          | 824   |              |              |              |              |              |              |              |              |
| biological process – 4478                                                             | 838   |              |              |              |              |              |              |              |              |
| metabolism – 3258                                                                     | 636   |              |              |              |              |              |              |              |              |
| cellular process – 4324                                                               | 820   |              |              |              |              |              |              |              |              |
| cell organization and biogenesis – 1591                                               | 342   |              |              |              |              |              |              |              |              |
| regulation of metabolism – 689                                                        | 161   |              |              |              |              |              |              |              |              |
| regulation of cellular metabolism – 665                                               | 155   |              |              |              |              |              |              |              |              |
| cellular metabolism – 3126                                                            | 620   |              |              |              |              |              |              |              |              |
| primary metabolism – 2988                                                             | 600   |              |              |              |              |              |              |              |              |
| cellular biosynthesis – 872                                                           |       |              |              |              |              |              | 23           |              |              |
| regulation of biological process – 894                                                | 206   |              |              |              |              |              |              |              |              |
| regulation of physiological process – 864                                             | 201   |              |              |              |              |              |              |              |              |
| regulation of cellular process – 858                                                  | 198   |              |              |              |              |              |              |              |              |
| cellular physiological process – 4294                                                 | 811   |              |              |              |              |              |              |              |              |
| regulation of cellular physiological process – 852                                    | 197   |              |              |              |              |              |              |              |              |
| organellar ribosome – 75                                                              | 17    |              |              |              |              | 11           |              |              |              |
| organellar large ribosomal subunit – 42                                               |       |              |              |              |              | 8            |              |              |              |
| cellular component – 5008                                                             | 928   |              |              |              |              |              |              |              |              |
| intracellular – 4444                                                                  | 865   |              |              |              |              |              |              |              |              |
| cell – 4998                                                                           | 928   |              |              |              |              |              |              |              |              |
| cytoplasm – 3266                                                                      | 658   |              |              |              |              |              |              |              |              |
| mitochondrion – 986                                                                   |       |              |              |              |              | 45           |              |              |              |
| mitochondrial envelope – 235                                                          |       |              |              |              |              | 18           |              |              |              |
| mitochondrial ribosome – 75                                                           | 17    |              |              |              |              | 11           |              |              |              |
| mitochondrial large ribosomal subunit – 42                                            |       |              |              |              |              | 8            |              |              |              |
| cytosol – 313                                                                         | 91    |              |              |              |              |              |              |              |              |
| cytosolic ribosome (sensu Eukaryota) – 130                                            | 52    |              |              |              |              |              |              |              |              |
| ribosome – 249                                                                        | 91    |              |              |              |              |              |              |              |              |
| ribonucleoprotein complex – 418                                                       | 139   |              |              |              |              |              |              |              |              |
| organelle – 3688                                                                      | 721   |              |              |              |              |              |              |              |              |
| membrane-bound organelle – 3409                                                       | 844   |              |              |              |              |              |              |              |              |
| non-membrane-bound organelle – 864                                                    | 253   |              |              |              |              |              |              |              |              |
| intracellular organelle – 3688                                                        | 721   |              |              |              |              |              |              |              |              |
| intracellular membrane-bound organelle – 3409                                         | 844   |              |              |              |              |              |              |              |              |
| intracellular non-membrane-bound organelle – 864                                      | 253   |              |              |              |              |              |              |              |              |
| protein complex – 1400                                                                | 390   |              |              |              |              |              |              |              |              |
| organelle part – 1965                                                                 | 510   |              |              |              |              |              |              |              |              |
| intracellular part – 4407                                                             | 861   |              |              |              | 126          |              |              |              |              |
| mitochondrial part – 377                                                              |       |              |              |              |              | 31           |              |              |              |
| cytoplasmic part – 2267                                                               | 463   |              |              |              |              |              |              |              |              |
| cytosolic part – 159                                                                  | 55    |              |              |              |              |              |              |              |              |
| intracellular organelle part – 1965                                                   | 510   |              |              |              |              |              |              |              |              |
| cell part – 4998                                                                      | 928   |              |              |              |              |              |              |              |              |
| nuclear envelope – 52                                                                 |       |              |              |              |              |              |              |              | 6            |
| cytoplasm – 1324                                                                      | 276   |              |              |              |              |              |              |              |              |
| mitochondrion – 937                                                                   |       |              |              |              |              | 43           |              |              |              |
| mitochondrial large ribosomal subunit – 42                                            |       |              |              |              |              | 8            |              |              |              |
| ribosome – 184                                                                        | 71    |              |              |              |              |              |              |              |              |
| nucleotide binding – 709                                                              | 167   |              |              |              |              |              |              |              |              |
| molecular function – 4328                                                             | 834   |              |              |              |              |              |              |              |              |
| nucleic acid binding – 895                                                            | 203   |              |              |              |              |              |              |              |              |
| structural constituent of ribosome – 203                                              |       |              |              |              |              | 16           |              |              |              |
| catalytic activity – 2012                                                             | 397   |              |              |              |              |              |              |              |              |
| binding – 3149                                                                        | 658   |              |              |              |              |              |              |              |              |
| protein binding – 1916                                                                | 392   |              |              |              |              |              |              |              |              |
| ATP binding – 524                                                                     | 129   |              |              |              |              |              |              |              |              |
| nucleotide binding – 641                                                              | 152   |              |              |              |              |              |              |              |              |
| DNA binding – 435                                                                     | 110   |              |              |              |              |              |              |              |              |
| structural constituent of ribosome – 203                                              |       |              |              |              |              | 16           |              |              |              |
| protein binding – 1669                                                                | 339   |              |              |              |              |              |              |              |              |
| ATP binding – 524                                                                     | 129   |              |              |              |              |              |              |              |              |
| PROTEIN FATE (folding, modification, destination) – 1133                              |       |              |              |              |              |              |              | 66           |              |
| PROTEIN WITH BINDING FUNCTION OR COFACTOR REQUIREMENT (structural or catalytic) – 998 | 219   |              |              |              |              |              |              |              |              |
| mitochondrion – 169                                                                   |       | 16           |              |              |              | 16           |              |              |              |
| UNCLASSIFIED PROTEINS – 1454                                                          |       |              | 88           |              |              | 55           |              | 106          |              |

1332    212    150    182    262    95    326    97  
 987    133    144    42    110    40    139    39  
 345    79    6    140    152    55    187    58  
 Protocol – B    Aeration type – Aerobic &    Protocol – A    S-source – Sulfate &    Protocol – B    Limiting element – Carbon &    Protocol – A    Limiting element – Carbon &    Protocol – B    Growth rate – .03 &    Protocol – A    Extra compound – Benzoate &    Protocol – B    Extra compound – none &
