# Supplementary material for: Combinatorial effects of environmental parameters on transcriptional regulation in Saccharomyces cerevisiae: A quantitative analysis of a compendium of chemostat-based transcriptome data
Source: PubMed Central journal article supplement (PMC2640415; doi:10.1186/1471-2164-10-53), 2009-01-27
Supplement: 1471-2164-10-53-S3.pdf [file 1471-2164-10-53-S3.pdf]

#### Protocol A:

Harvest ~ 700 µg total RNA.

Perform the One-Cycle Target Labeling and Control Reagents Eukaryotic Target Preparation steps as described in [1]. This includes the Poly-A mRNA Isolation step. After purification, there is ~ 11 µg purified mRNA, of which 3-5 µg will be used in the following steps.

#### Disadvantages:

- time,
- money,
- since different mRNA's have different lengths of the poly A-tail, the purification step that filters on the mRNA poly-A tail could form a bias.

#### Advantages:

- rRNA and tRNA cannot interfere with cDNA synthesis.

#### Protocol B:

Harvest ~ 15 µg total RNA.

Perform the One-Cycle Target Labeling and Control Reagents Eukaryotic Target Preparation steps as described in [2]. However, do not perform the Poly-A mRNA Isolation step.

#### Disadvantages:

- rRNA and tRNA can interfere with cDNA synthesis.

#### Advantages:

- time,
- money,
- possible bias induced by filtering on the poly-A tails is circumvented.

[1] AffyMetrix, GeneChip Expression Analysis Technical Manual P/N 700219 rev 4, 2000

[2] AffyMetrix, GeneChip Expression Analysis Technical Manual P/N 701025 rev 5, 2000
