# Supplementary material for: Combinatorial effects of environmental parameters on transcriptional regulation in Saccharomyces cerevisiae: A quantitative analysis of a compendium of chemostat-based transcriptome data
Source: PubMed Central journal article supplement (PMC2640415; doi:10.1186/1471-2164-10-53), 2009-01-27
Supplement: 1471-2164-10-53-S4.pdf [file 1471-2164-10-53-S4.pdf]

Q = 5.5 · 10<sup>-3</sup> P = 10<sup>-5</sup>

Q = 8 · 10<sup>-26</sup> P = 10<sup>-30</sup>

Limiting element - Nitrogen & Growth rate - 1  
 Extra compound - Benzoate & Limiting element - Nitrogen  
 Aeration type - Acetate Ethanol  
 S-source - Methionine & Limiting element - Sulfate  
 Extra compound - Benzozole & Limiting element - Carbon  
 Aeration type - Acrylic & Limiting element - Carbon  
 N-source - Leucine & Limiting element - Nitrogen  
 Growth rate - 0.3 0.5  
 Limiting element - Nitrogen & Growth rate - 1  
**Limiting element - Phosphorus Sulfur**  
 N-source - Leucine / Phenylalanine  
 S-source - Sulfate & Limiting element - Carbon  
 N-source - Methionine & Limiting element - Nitrogen & Growth rate - 1  
 S-source - 7. Ammonium sulfate & Limiting element - Carbon  
 C-source - Methionine & Limiting element - Nitrogen  
 Aeration type - Ethanol / Glucose & pH 5  
 Limiting element - Ammonium sulfate & Limiting element - Nitrogen  
 Aeration type - Ammonium sulfate & Limiting element - Nitrogen  
 Limiting element - Asparagine  
 Limiting element - Iron  
 Limiting element - N-source - Ammonium sulfate  
 Limiting element - Carbon & Extra compound - CO<sub>2</sub>  
 Limiting element - Acetate Propionate  
 Limiting element - Carbon & Extra compound - CO<sub>2</sub>

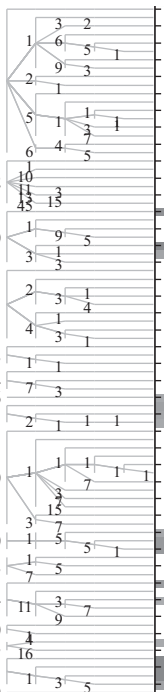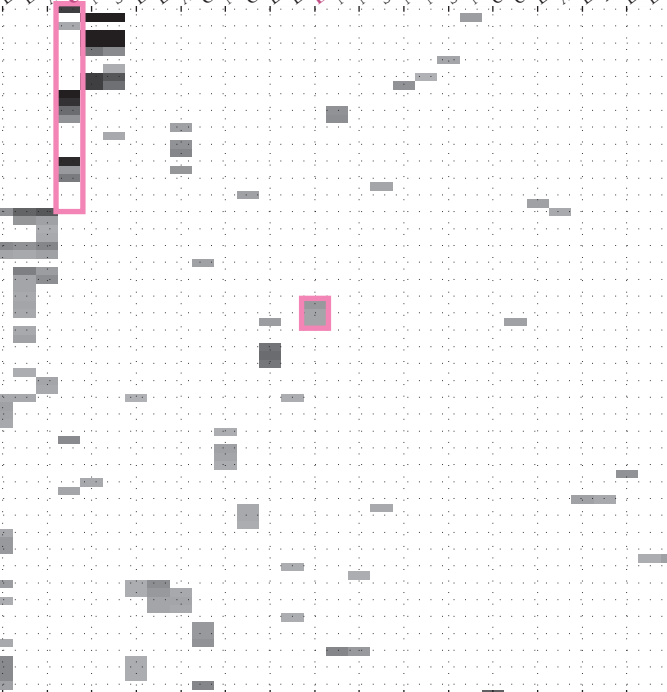

**METABOLISM**  
 - amino acid metabolism  
 - metabolism of glutamate  
 - metabolism of the aspartate family  
 - metabolism of methionine  
 - biosynthesis of methionine  
 - metabolism of the cysteine - aromatic group  
 - metabolism of cysteine  
 - nitrogen and sulfur metabolism  
 - nitrogen and sulfur utilization  
**C-compound and carbohydrate metabolism**  
**C-compound and carbohydrate utilization**  
**C-compound, carbohydrate catabolism**  
 - sugar, glycoside, polyol and carboxylate catabolism  
 - transfer of activated C-1 groups  
 - degradation of lipids, fatty acids and isoprenoids  
 - fatty acid degradation (alpha- and beta-oxidation)  
**ENERGY**  
**glycolysis and gluconeogenesis**  
 - tricarboxylic acid pathway (citrate cycle, Krebs cycle, TCA cycle)  
 - electron transport and membrane-associated energy conservation  
 - aerobic respiration  
 - energy generation (e.g. ATP synthase)  
**CELL CYCLE AND DNA PROCESSING**  
 - DNA processing  
 - DNA restriction or modification  
 - DNA conformation modification (e.g. chromatin)  
 - cell cycle  
 - mitotic cell cycle and cell cycle control  
 - cytokinesis (cell division) / septum formation  
**TRANSCRIPTION**  
 - RNA synthesis  
 - mRNA synthesis  
 - general transcription activities  
 - transcriptional control  
**RNA processing**  
 - RNA processing  
 - miRNA processing (splicing, 5'-, 3'-end processing)  
 - splicing  
**PROTEIN SYNTHESIS**  
 - ribosome biogenesis  
 - ribosomal proteins  
**PROTEIN FATE (folding, modification, destination)**  
 - protein modification  
 - modification by phosphorylation, dephosphorylation, autophosphorylation  
**PROTEIN WITH BINDING FUNCTION OR COFACTOR REQUIREMENT**  
**PROTEIN ACTIVITY REGULATION**  
 - target of regulation  
 - GTPase activator (GAP)  
**CELLULAR TRANSPORT, TRANSPORT FACILITATION AND TRANSPORT ROUTES**  
 - transported compounds (substrates)  
 - ion transport  
 - cation transport (Na, K, Ca, NH<sub>4</sub>, etc.)  
 - heavy metal ion transport (Cu, Fe, etc.)  
 - siderophore-iron transport  
 - anion transport (Cl, SO<sub>4</sub>, PO<sub>4</sub>, etc.)  
 - C-compound and carbohydrate transport  
 - amino acid transport  
 - electron / hydrogen transport  
 - transport facilitation  
 - antiporters  
 - enzyme mediated signal transduction  
 - G-protein mediated signal transduction  
 - anti-GTPase mediated signal transduction  
 - stress response  
 - heat shock response  
 - detoxification  
**INTERACTION WITH THE CELLULAR ENVIRONMENT**  
 - chemoperception and response  
 - pheromone response, mating-type determination, sex-specific proteins  
 - temperature perception and response  
**CELL FATE**  
 - cell growth / morphogenesis  
 - cytoskeleton  
 - mitochondrion  
**CELL TYPE DIFFERENTIATION**  
 - fungal macroeukaryotic cell type differentiation  
 - fungal and other eukaryotic cell type differentiation  
 - budding, cell polarity and filament formation  
**UNCLASSIFIED PROTEINS**
