# Supplementary material for: Combinatorial effects of environmental parameters on transcriptional regulation in Saccharomyces cerevisiae: A quantitative analysis of a compendium of chemostat-based transcriptome data
Source: PubMed Central journal article supplement (PMC2640415; doi:10.1186/1471-2164-10-53), 2009-01-27
Supplement: 1471-2164-10-53-S7.pdf [file 1471-2164-10-53-S7.pdf]

[http://www-ict.ewi.tudelft.nl/~theo/CSSC\\_GeneVisualizer\\_pkg.exe](http://www-ict.ewi.tudelft.nl/~theo/CSSC_GeneVisualizer_pkg.exe) (when Matlab R2006 is on your machine)

[http://www-ict.ewi.tudelft.nl/~theo/CSSC\\_GeneVisualizer\\_mcr\\_pkg.exe](http://www-ict.ewi.tudelft.nl/~theo/CSSC_GeneVisualizer_mcr_pkg.exe) (when Matlab R2006 is not on your machine).
