# Supplementary material for: Combinatorial effects of environmental parameters on transcriptional regulation in Saccharomyces cerevisiae: A quantitative analysis of a compendium of chemostat-based transcriptome data
Source: PubMed Central journal article supplement (PMC2640415; doi:10.1186/1471-2164-10-53), 2009-01-27

# Array ID

Description of the predictors

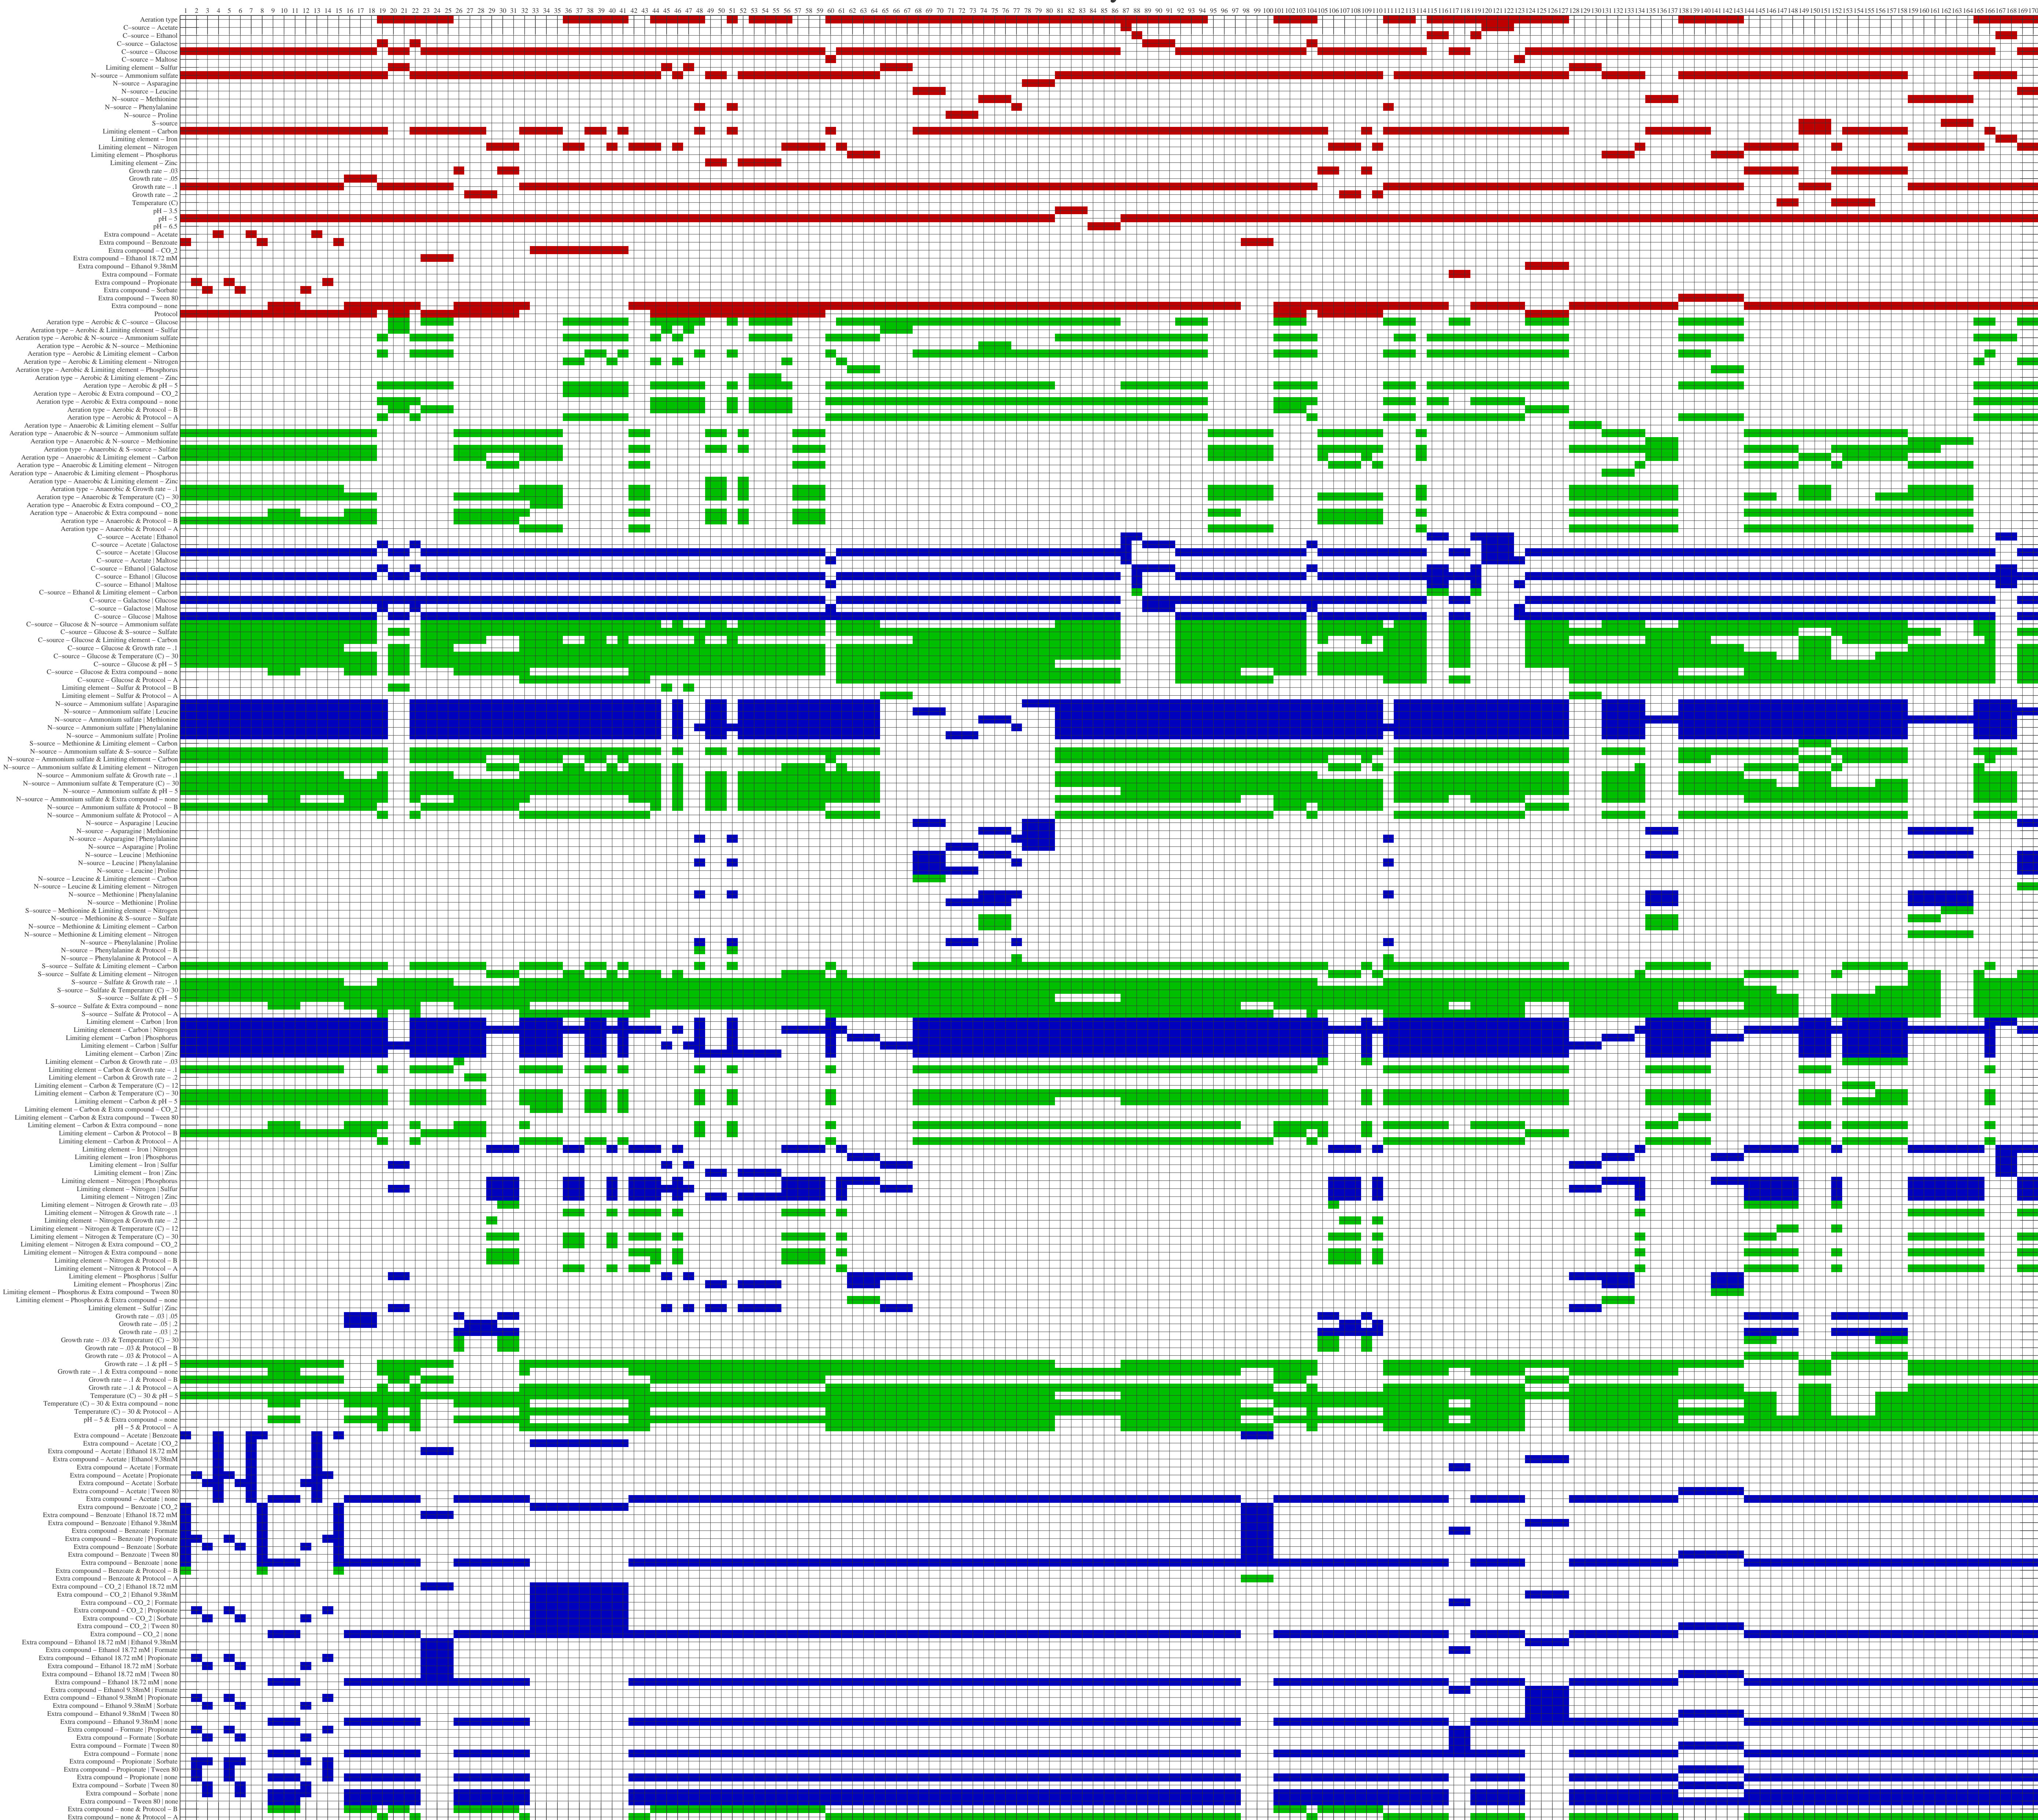

Supplement: 1471-2164-10-53-S8.pdf [file 1471-2164-10-53-S8.pdf]
